# Supplementary material for: Sexual coordination in a whole-brain map of prairie vole pair bonding
Source: bioRxiv preprint, doi:10.1101/2023.07.26.550685, version 2 (2023-10-28)
Supplement: Supplementary File 1 [file 550685_file02.xlsx]

## Sheet: TableS1
			Volume								Volume proportion		Area/Whole brain volume Ratio
ROIs	regionLabels	structureOrder	Mouse.mean	Mouse.std	PrairieVole.mean	PrairieVole.std	z	p-value	q-value		PrairieVole/Mouse volume		Mouse.mean	Mouse.std	PrairieVole.mean	PrairieVole.std	z	p-value	q-value
null	0	0	1.05172e+07	569623	1.46262e+07	864849	36.9566	5.7e-299	5.41e-298		1.3907		1	0	1	0	0	1	1
root	997	0	1.05172e+07	569623	1.46262e+07	864849	36.9566	5.7e-299	5.41e-298		1.3907		1	0	1	0	0	1	1
grey	8	100	1.05165e+07	569570	1.46252e+07	864765	36.9565	5.73e-299	5.41e-298		1.39068		0.99994	1.49519e-05	0.999927	1.62083e-05	7.65699e-05	0.999939	1
CH	567	200	5.55078e+06	279924	7.94264e+06	563881	38.3288	0	0		1.4309		0.528207	0.0186316	0.543119	0.0235656	-0.127456	0.89858	1
CTX	688	300	4.43069e+06	223836	6.48655e+06	475949	39.9439	0	0		1.464		0.42172	0.01755	0.443605	0.0222579	-0.208441	0.834884	1
CTXpl	695	400	4.24301e+06	216415	6.2456e+06	466322	39.9485	0	0		1.47197		0.403851	0.0169208	0.427096	0.0216673	-0.226013	0.821191	1
Isocortex	315	500	2.69293e+06	149377	3.99816e+06	305512	38.8553	0	0		1.48469		0.25632	0.0121914	0.273447	0.015382	-0.20867	0.834706	1
FRP	184	600	15349.7	1579.79	31739.7	8367.97	21.6978	2.15e-104	6.6e-104		2.06777		0.00145952	0.000129199	0.00216624	0.000543254	-0.105871	0.915685	1
FRP1	68	700	12928.3	1351.71	26544	7376.58	20.0968	7.87e-90	2.16e-89		2.05318		0.00122924	0.000110815	0.00181152	0.000481147	-0.0952246	0.924136	1
FRP2/3	667	800	2421.42	250.461	5195.66	1102.61	28.9779	1.25e-184	7.16e-184		2.14571		0.000230277	2.0888e-05	0.000354719	6.97264e-05	-0.0464738	0.962933	1
MO	500	900	467997	33024.4	845509	71260.8	49.2481	0	0		1.80666		0.0445684	0.00323162	0.0578338	0.00394216	-0.371751	0.710078	1
MOp	985	1500	248120	19537.4	413920	36238.2	39.4944	0	0		1.66823		0.0236569	0.0022401	0.0283343	0.00232787	-0.18319	0.854649	1
MOp1	320	1600	38399.9	3029.58	68184.5	5852.85	44.7881	0	0		1.77564		0.00366137	0.000346971	0.00466891	0.00039475	-0.0989106	0.921209	1
MOp2/3	943	1700	82400.8	6480.17	143428	12312.1	43.2425	0	0		1.74061		0.0078572	0.000746923	0.0098201	0.000816752	-0.132145	0.894869	1
MOp5	648	1800	72766.9	5956.3	117975	11521.7	34.7607	9.56e-265	8.13e-264		1.62127		0.00693858	0.000682318	0.00807374	0.000725199	-0.0826003	0.934169	1
MOp6a	844	1900	46410.5	4064.31	72191	7605.33	29.5993	1.53e-192	9.53e-192		1.55549		0.00442399	0.000446019	0.00494054	0.000482246	-0.0474733	0.962136	1
MOp6b	882	2000	8141.84	882.684	12142.2	1384.75	23.0107	3.64e-117	1.25e-116		1.49134		0.000775722	8.9797e-05	0.000830968	8.79164e-05	-0.0122261	0.990245	1
MOs	993	2100	219877	21650.6	431589	51675.8	39.4267	0	0		1.96287		0.0209115	0.00178404	0.0294995	0.00301896	-0.344329	0.730599	1
MOs1	656	2200	48400.2	5692.79	95591	12571	33.9453	1.43e-252	1.15e-251		1.97501		0.00460007	0.000468803	0.00653271	0.000748679	-0.164937	0.868994	1
MOs2/3	962	2300	74931.5	8477.82	149394	19399.3	35.8388	2.75e-281	2.5e-280		1.99374		0.007124	0.000704974	0.0102095	0.00114905	-0.211115	0.832798	1
MOs5	767	2400	65773.9	6510.76	129125	16445.6	38.4144	0	0		1.96317		0.00625682	0.000551365	0.00882462	0.000970585	-0.188228	0.850698	1
MOs6a	1021	2500	28071.4	2494.92	52991.6	5736.18	41.8817	0	0		1.88774		0.00267349	0.000248921	0.00362549	0.000356771	-0.107795	0.914158	1
MOs6b	1085	2600	2699.86	307.348	4487.92	492.831	29.0306	2.7e-185	1.59e-184		1.66228		0.000257172	3.06869e-05	0.000307152	3.11714e-05	-0.0187855	0.985012	1
SS	453	2700	832698	58883.4	952415	79859.5	11.1945	4.34e-29	7.34e-29		1.14377		0.0793086	0.00589944	0.0651795	0.00492095	0.323312	0.746459	1
SSp	322	2800	707139	49918.1	814759	67881.8	11.8467	2.24e-32	3.9e-32		1.15219		0.067339	0.00485308	0.0557601	0.00418458	0.287236	0.773932	1
SSp1	793	2900	7205.93	622.1	10478.2	1070.88	25.4899	2.55e-143	1.07e-142		1.45411		0.000686187	5.97298e-05	0.000717341	7.09882e-05	-0.00736486	0.994124	1
SSp2/3	346	3000	16162.9	1379.37	22332.4	2161.43	22.6675	9.38e-114	3.11e-113		1.38171		0.00153907	0.000131491	0.00152847	0.000138518	0.00168881	0.998653	1
SSp4	865	3100	4900.16	401.735	6503.2	614.286	20.5379	9.88e-94	2.79e-93		1.32714		0.000466563	3.76874e-05	0.000444929	3.74493e-05	0.00630576	0.994969	1
SSp5	921	3200	17451.7	1480.24	22710.1	2380.42	17.9103	9.8e-72	2.35e-71		1.30131		0.00166164	0.000139008	0.0015535	0.000146441	0.0167572	0.98663	1
SSp6a	686	3300	11724.8	907.676	15857.2	1615.1	21.845	8.67e-106	2.69e-105		1.35245		0.0011166	8.8231e-05	0.00108527	0.000104639	0.00588376	0.995305	1
SSp6b	719	3400	1891.72	133.866	2556.11	220.853	24.6148	8.77e-134	3.44e-133		1.35121		0.000180086	1.21037e-05	0.000174999	1.45229e-05	0	1	1
SSp-n	353	3500	34271.8	3332.78	36685.7	4399.13	4.03148	5.54e-05	8.07e-05		1.07043		0.00326217	0.000305215	0.00250881	0.000268398	0.0857689	0.93165	1
SSp-n1	558	3600	4234.66	471.855	5150.23	646.401	10.5937	3.19e-26	5.3e-26		1.21621		0.000403349	4.64937e-05	0.000352318	4.08691e-05	0.0162274	0.987053	1
SSp-n2/3	838	3700	9996.82	1076.73	11416.6	1420.83	7.33545	2.21e-13	3.4e-13		1.14202		0.000951808	0.000102244	0.000780883	8.86714e-05	0.0357113	0.971513	1
SSp-n4	654	3800	4001.21	418.594	4176.34	535.928	2.36859	0.0178562	0.0253368		1.04377		0.000380893	3.89572e-05	0.000285604	3.31639e-05	0.0318513	0.974591	1
SSp-n5	702	3900	8643.61	975.422	8652.75	1135.82	0.0553548	0.955856	1		1.00106		0.000822484	8.73126e-05	0.00059161	6.97571e-05	0.0527813	0.957906	1
SSp-n6a	889	4000	6121.22	791.718	5979.87	800.177	-1.12161	0.262028	0.364891		0.976908		0.000582394	7.13009e-05	0.000408806	4.90808e-05	0.0472931	0.96228	1
SSp-n6b	929	4100	1274.31	172.094	1309.93	164.208	1.32265	0.18595	0.260765		1.02795		0.000121237	1.55335e-05	8.95944e-05	1.02898e-05	0.0187809	0.985016	1
SSp-bfd	329	4200	230126	20954.4	251261	22244.3	6.16525	7.04e-10	1.06e-09		1.09184		0.0219107	0.00196486	0.0171997	0.00143506	0.206393	0.836484	1
SSp-bfd1	981	4300	21291.9	2053.21	27108.7	2306.46	16.5089	3.16e-61	6.95e-61		1.27319		0.00202915	0.000211329	0.00185688	0.000161259	0.0242431	0.980659	1
SSp-bfd2/3	201	4400	63429.7	6153.44	76487.7	6559.22	12.715	4.88e-37	8.78e-37		1.20586		0.00604252	0.000609417	0.00523772	0.00044177	0.0661974	0.947221	1
SSp-bfd4	1047	4500	29931.2	2920.64	33101.6	3195.64	6.55984	5.39e-11	8.16e-11		1.10592		0.0028502	0.000277661	0.00226565	0.000205162	0.0708865	0.943488	1
SSp-bfd5	1070	4600	56166.4	5402.61	57801.5	5921.15	1.83893	0.0659248	0.0929927		1.02911		0.00534611	0.000489677	0.00395524	0.00037412	0.1243	0.901077	1
SSp-bfd6a	1038	4700	49406.3	4583.84	47337.1	4969.99	-2.76297	0.00572788	0.00819537		0.958118		0.0047009	0.000394216	0.00323931	0.000317686	0.140446	0.888307	1
SSp-bfd6b	1062	4800	9900.52	876.854	9424.25	956.509	-3.31224	0.000925525	0.00133538		0.951894		0.000941803	7.21247e-05	0.000644939	6.11707e-05	0.0637746	0.94915	1
SSp-ll	337	4900	84915.4	9374.41	106324	11739.2	12.8819	5.69e-38	1.03e-37		1.25212		0.00809511	0.000991499	0.00727625	0.000743878	0.0578628	0.953858	1
SSp-ll1	1030	5000	8599.52	790.276	10574.7	1431.16	12.0562	1.8e-33	3.17e-33		1.22969		0.000819953	8.77216e-05	0.000724075	9.76099e-05	0.0213473	0.982969	1
SSp-ll2/3	113	5100	19999.2	1993.36	24746	3154.09	12.2477	1.73e-34	3.05e-34		1.23735		0.00190682	0.000216942	0.0016943	0.000212586	0.0309984	0.975271	1
SSp-ll4	1094	5200	7428.45	779.52	9132.89	1027.32	12.12	8.27e-34	1.46e-33		1.22945		0.000708257	8.40962e-05	0.000625137	6.66607e-05	0.0199142	0.984112	1
SSp-ll5	1128	5300	24207	2812.93	30402.3	3474.81	12.4861	8.89e-36	1.58e-35		1.25593		0.0023079	0.000296926	0.00208013	0.000215467	0.0301308	0.975963	1
SSp-ll6a	478	5400	20308.6	2610.87	25909.4	3144.49	12.2641	1.41e-34	2.5e-34		1.27578		0.00193557	0.000266012	0.0017723	0.000192796	0.0235246	0.981232	1
SSp-ll6b	510	5500	4372.62	612.896	5559.02	732.038	11.1485	7.28e-29	1.23e-28		1.27132		0.000416604	6.07146e-05	0.000380317	4.60778e-05	0.0112747	0.991004	1
SSp-m	345	5600	57696.9	6078.67	66720.4	7770.66	8.3516	6.73e-17	1.06e-16		1.1564		0.0054923	0.000562174	0.00456387	0.000484905	0.0806035	0.935757	1
SSp-m1	878	5700	7188.89	729.303	9316.72	1078.82	15.2745	1.13e-52	2.31e-52		1.29599		0.000684295	6.72319e-05	0.000637755	7.10904e-05	0.0112447	0.991028	1
SSp-m2/3	657	5800	16106.7	1722.8	19557	2389.02	10.8475	2.05e-27	3.43e-27		1.21422		0.001533	0.000157256	0.00133809	0.000152863	0.0317952	0.974635	1
SSp-m4	950	5900	5887.9	670.837	6651.77	857.57	6.40608	1.49e-10	2.26e-10		1.12974		0.000560369	6.11688e-05	0.000454894	5.36771e-05	0.0287634	0.977053	1
SSp-m5	974	6000	15596.6	1838.48	16823.5	2241.86	3.8478	0.000119182	0.000173421		1.07867		0.00148454	0.000169628	0.00115026	0.000139713	0.0563609	0.955054	1
SSp-m6a	1102	6100	10901.2	1257.69	11955.2	1529.21	4.84525	1.26e-06	1.86e-06		1.0967		0.00103811	0.000119907	0.000817563	9.60602e-05	0.044372	0.964608	1
SSp-m6b	2	6200	2015.62	226.891	2416.11	285.479	10.0197	1.25e-23	2.03e-23		1.1987		0.00019198	2.19601e-05	0.000165308	1.83799e-05	0	1	1
SSp-ul	369	6300	137658	13097.5	147214	14006.1	4.44994	8.59e-06	1.26e-05		1.06942		0.0131096	0.00127293	0.0100759	0.000892947	0.172308	0.863195	1
SSp-ul1	450	6400	14773.4	1527.63	17445.6	1970.6	9.91461	3.6e-23	5.82e-23		1.18088		0.0014064	0.000142125	0.00119535	0.000139846	0.0360895	0.971211	1
SSp-ul2/3	854	6500	38058.9	3929.59	43016	4245.34	7.64342	2.12e-14	3.28e-14		1.13025		0.00362347	0.00036933	0.0029461	0.00029164	0.0726261	0.942104	1
SSp-ul4	577	6600	14682.3	1484.94	15816.1	1574.57	4.66747	3.05e-06	4.48e-06		1.07722		0.00139799	0.000141249	0.00108234	9.90733e-05	0.0548489	0.956259	1
SSp-ul5	625	6700	36251.8	3532.11	37648	4238.41	2.30313	0.0212713	0.030147		1.03851		0.00345292	0.000348998	0.00257508	0.00026065	0.0975219	0.922312	1
SSp-ul6a	945	6800	28375.1	2550.77	27852	3264.76	-1.16197	0.245247	0.341921		0.981565		0.00270324	0.000261547	0.00190505	0.000202867	0.100892	0.919636	1
SSp-ul6b	1026	6900	5516.57	477.949	5436.56	618.605	-0.944776	0.344773	0.477348		0.985495		0.000525593	4.98835e-05	0.000371957	3.92008e-05	0.0440202	0.964888	1
SSp-tr	361	7000	103134	6769.45	126116	12258.8	16.0584	4.99e-58	1.07e-57		1.22284		0.009819	0.00062833	0.00863099	0.000773068	0.0764916	0.939028	1
SSp-tr1	1006	7100	11044	809.619	13933.2	1681.47	15.9113	5.29e-57	1.11e-56		1.26161		0.0010515	7.52786e-05	0.000954284	0.000116297	0.0190316	0.984816	1
SSp-tr2/3	670	7200	29772	2081.54	36454.9	4055.85	14.7024	6.22e-49	1.23e-48		1.22447		0.00283442	0.000191329	0.00249615	0.000275076	0	1	1
SSp-tr4	1086	7300	11171.7	751.09	13737.7	1397.05	15.9153	4.97e-57	1.04e-56		1.22969		0.00106356	6.8714e-05	0.000940199	8.91645e-05	0.0241126	0.980763	1
SSp-tr5	1111	7400	26485.4	1745.45	32488.8	3415.86	15.5547	1.48e-54	3.06e-54		1.22667		0.00252155	0.000162293	0.00222236	0.000204674	0	1	1
SSp-tr6a	9	7500	20009.8	1389.81	23924.4	2528.54	13.3444	1.28e-40	2.36e-40		1.19563		0.00190514	0.00013226	0.00163645	0.000150032	0.0394139	0.96856	1
SSp-tr6b	461	7600	4650.95	319.432	5576.7	574.006	13.8669	1.01e-43	1.9e-43		1.19905		0.000442825	3.05474e-05	0.000381554	3.49592e-05	0.0186336	0.985133	1
SSs	378	7700	125559	11977.1	137656	15262.1	5.73572	9.71e-09	1.44e-08		1.09635		0.0119696	0.00127226	0.00941949	0.000978578	0.151108	0.87989	1
SSs1	873	7800	13649	1379.48	16597.4	1870.79	11.7535	6.78e-32	1.18e-31		1.21602		0.00130124	0.000145355	0.00113604	0.000122835	0.02925	0.976665	1
SSs2/3	806	7900	28916	2962.7	34046	3844.78	9.70385	2.9e-22	4.64e-22		1.17741		0.00275747	0.000318608	0.00233006	0.000249893	0.0522419	0.958336	1
SSs4	1035	8000	14608.5	1565.36	16216.1	1843	6.01901	1.75e-09	2.63e-09		1.11004		0.00139322	0.000168164	0.00110967	0.000118813	0.0491678	0.960786	1
SSs5	1090	8100	31700.8	3319.52	33414.8	3824.82	3.06613	0.00216848	0.00312501		1.05407		0.00302281	0.000354088	0.00228626	0.000244447	0.087299	0.930434	1
SSs6a	862	8200	29073.1	3020.35	29685	3360.96	1.22637	0.220059	0.307518		1.02105		0.00277009	0.000300879	0.00203088	0.000212995	0.0918756	0.926797	1
SSs6b	893	8300	7607.63	776.028	7690.07	858.856	0.646352	0.518051	0.71478		1.01084		0.00072442	7.32264e-05	0.000526124	5.43818e-05	0.0482494	0.961518	1
ILA	44	8400	38487.2	7217.12	78816	12112.6	24.2476	7.01e-130	2.61e-129		2.04785		0.00364682	0.000596134	0.0053751	0.000662865	-0.16409	0.86966	1
ILA1	707	8500	6340.89	1619.39	12291.9	1444.24	395.96	0	0		1.93851		0.000600387	0.000145899	0.000839504	7.5114e-05	-0.0567061	0.954779	1
ILA2	747	8600	2039.11	538.957	3954.54	656.079	14.985	9.21e-51	1.83e-50		1.93935		0.000192915	4.7705e-05	0.000269595	3.72808e-05	-0.0320845	0.974405	1
ILA2/3	556	8700	11699.8	2613.84	24175.8	3530.4	20.3943	1.88e-92	5.24e-92		2.06634		0.00110766	0.000225009	0.0016492	0.00019216	-0.0930493	0.925864	1
ILA5	827	8800	10752.6	2535.21	22490.6	4652.36	19.684	2.96e-86	7.99e-86		2.09164		0.00101797	0.00021676	0.0015316	0.000274083	-0.0918061	0.926852	1
ILA6a	1054	8900	6256.39	608.943	13212.1	2261.9	37.049	1.87e-300	1.8e-299		2.11177		0.00059492	4.91985e-05	0.000901382	0.000130289	-0.0715205	0.942983	1
ILA6b	1081	9000	1398.4	151.316	2691.02	385.11	34.2233	1.09e-256	8.9e-256		1.92436		0.000132973	1.26998e-05	0.000183815	2.23385e-05	-0.0256926	0.979503	1
GU	1057	9100	45590.9	3945.18	62834	6051.28	22.2924	4.38e-110	1.4e-109		1.37821		0.0043417	0.000381399	0.00430027	0.000386288	0.0039325	0.996862	1
GU1	36	9200	8010.77	750.586	11273.8	1133.03	22.2534	1.05e-109	3.32e-109		1.40734		0.000763014	7.4351e-05	0.000771455	7.1462e-05	-0.00190413	0.998481	1
GU2/3	180	9300	11468.4	1068.93	15903.6	1638.19	21.1303	4.19e-99	1.23e-98		1.38674		0.00109225	0.000104511	0.00108834	0.000104935	0.000737576	0.999411	1
GU4	148	9400	3059.27	286.351	4135.28	421.98	19.525	6.74e-85	1.8e-84		1.35172		0.000291357	2.78699e-05	0.000282962	2.6698e-05	0.00308659	0.997537	1
GU5	187	9500	11822.8	1118.49	16424.6	1634.72	21.4538	4.21e-102	1.27e-101		1.38923		0.00112578	0.000105877	0.00112417	0.000106056	0.000299731	0.999761	1
GU6a	638	9600	9580.18	867.783	13000.7	1242.48	20.8176	3e-96	8.66e-96		1.35704		0.000912305	8.27398e-05	0.000889892	8.08196e-05	0.00465347	0.996287	1
GU6b	662	9700	1649.52	187.331	2096	216.683	13.7021	9.86e-43	1.84e-42		1.27067		0.000156997	1.70929e-05	0.000143445	1.3973e-05	0.00685836	0.994528	1
VISC	677	9800	38467	3779.76	45075.8	4717.9	9.93641	2.89e-23	4.68e-23		1.1718		0.00366764	0.000406087	0.00308501	0.000307163	0.0617895	0.95073	1
VISC1	897	9900	6343.24	655.618	7889.52	833.138	13.2583	4.04e-40	7.44e-40		1.24377		0.000604597	6.77389e-05	0.000540058	5.48843e-05	0.016704	0.986673	1
VISC2/3	1106	10000	8377.62	890.461	10238.2	1082.45	11.9406	7.27e-33	1.27e-32		1.22209		0.000798748	9.41074e-05	0.000700683	7.01753e-05	0.0221449	0.982332	1
VISC4	1010	10100	4034.25	437.3	4816.46	512.201	10.3766	3.17e-25	5.21e-25		1.19389		0.000384687	4.6462e-05	0.0003296	3.30904e-05	0.0179896	0.985647	1
VISC5	1058	10200	9888.75	1040.07	11351.9	1213.25	8.23221	1.84e-16	2.88e-16		1.14796		0.000943201	0.000113579	0.00077701	7.99406e-05	0.0348601	0.972191	1
VISC6a	857	10300	8299.73	863.72	9166.49	1008.99	5.90089	3.62e-09	5.41e-09		1.10443		0.000791268	9.08405e-05	0.000627281	6.54732e-05	0	1	1
VISC6b	849	10400	1523.45	154.604	1613.28	183.726	3.41708	0.000632962	0.000917681		1.05896		0.00014514	1.53146e-05	0.000110378	1.16977e-05	0.0187899	0.985009	1
AUD	247	10500	153326	14348.6	222971	19122.3	25.7751	1.69e-146	7.28e-146		1.45423		0.0146242	0.00157759	0.0152734	0.00133771	-0.0332493	0.973476	1
AUDd	1011	10600	49706.9	4623.27	71830.8	6021.92	25.6468	4.59e-145	1.96e-144		1.44509		0.00473862	0.000488047	0.00492115	0.000431027	-0.0164407	0.986883	1
AUDd1	527	10700	5509.69	582.145	8518.11	766.498	26.9857	2.18e-160	1.05e-159		1.54602		0.000525776	6.3874e-05	0.000583737	5.60295e-05	-0.0154702	0.987657	1
AUDd2/3	600	10800	12598.8	1352.52	19087.7	1690.23	25.5356	7.94e-144	3.38e-143		1.51503		0.00120203	0.00014617	0.00130784	0.000121735	-0.0187536	0.985038	1
AUDd4	678	10900	5046.56	541.662	7517.72	665.413	24.6427	4.41e-134	1.73e-133		1.48967		0.000481291	5.72273e-05	0.000515035	4.7373e-05	-0.00948225	0.992434	1
AUDd5	252	11000	13768.3	1370.64	19689.3	1699.47	23.6052	3.41e-123	1.22e-122		1.43004		0.00131237	0.000141366	0.00134875	0.000119422	-0.0062393	0.995022	1
AUDd6a	156	11100	9641.66	852.918	12775.3	1122.8	20.0653	1.48e-89	4.06e-89		1.32501		0.000918085	8.05701e-05	0.000875142	7.95164e-05	0	1	1
AUDd6b	243	11200	3141.84	258.882	4242.69	367.964	22.5398	1.69e-112	5.56e-112		1.35038		0.000299073	2.33472e-05	0.000290648	2.61658e-05	0	1	1
AUDp	1002	11300	52705.5	5203.58	77998.5	7107.52	25.4906	2.51e-143	1.06e-142		1.47989		0.00502793	0.000570838	0.00534319	0.000498063	-0.0274461	0.978104	1
AUDp1	735	11400	6008.33	620.43	9229.92	907.644	26.3728	2.81e-153	1.26e-152		1.53619		0.00057354	6.99556e-05	0.000632113	6.16407e-05	-0.0149908	0.98804	1
AUDp2/3	251	11500	13429.4	1425.19	20581.5	1994.35	25.8083	7.15e-147	3.09e-146		1.53258		0.0012819	0.00015911	0.00140986	0.000139005	-0.0219155	0.982515	1
AUDp4	816	11600	5900.34	648.263	9040.11	850.515	25.4091	2e-142	8.35e-142		1.53213		0.00056327	7.21859e-05	0.000619226	5.8738e-05	-0.014458	0.988465	1
AUDp5	847	11700	15430.7	1656.15	22567.6	2090.31	23.2295	2.29e-119	8.04e-119		1.46251		0.00147197	0.000177747	0.00154601	0.000146894	-0.0119396	0.990474	1
AUDp6a	954	11800	9012.9	901.846	12521.1	1138.64	21.391	1.62e-101	4.85e-101		1.38924		0.000858837	9.10045e-05	0.000857912	8.20142e-05	0.000197204	0.999843	1
AUDp6b	1005	11900	2923.87	270.597	4058.33	364.713	22.6931	5.24e-114	1.74e-113		1.388		0.000278417	2.56266e-05	0.000278069	2.61251e-05	0.000130342	0.999896	1
AUDpo	1027	12000	3185.5	339.079	5516.48	603.635	31.6976	1.68e-220	1.19e-219		1.73175		0.000304098	3.80473e-05	0.00037771	4.0358e-05	-0.0252253	0.979875	1
AUDpo1	696	12100	382.204	45.9471	677.885	85.3753	29.2941	1.23e-188	7.39e-188		1.77362		3.64835e-05	4.99731e-06	4.64062e-05	5.66809e-06	-0.00976419	0.992209	1
AUDpo2/3	643	12200	860.491	100.221	1476.72	177.578	28.5304	4.92e-179	2.73e-178		1.71614		8.21793e-05	1.12146e-05	0.000101102	1.18549e-05	-0.0125	0.990027	1
AUDpo4	759	12300	323.648	38.2413	569.574	71.7657	29.1464	9.28e-187	5.51e-186		1.75985		3.09119e-05	4.29428e-06	3.8994e-05	4.8221e-06	-0.00865648	0.993093	1
AUDpo5	791	12400	1071.12	116.113	1911.46	211.8	33.0045	7.01e-239	5.35e-238		1.78454		0.000102251	1.29413e-05	0.000130882	1.42313e-05	-0.0168049	0.986592	1
AUDpo6a	249	12500	380.519	41.2914	624.393	61.8895	29.7563	1.44e-194	9.08e-194		1.6409		3.6301e-05	4.46411e-06	4.27658e-05	4.22569e-06	-0.00648655	0.994825	1
AUDpo6b	456	12600	167.519	19.578	256.443	27.7546	23.7542	9.94e-125	3.59e-124		1.53083		1.59712e-05	2.01653e-06	1.75597e-05	1.87834e-06	-0.00243737	0.998055	1
AUDv	1018	12700	47727.8	4500.13	67625.2	6254.64	23.2756	7.83e-120	2.75e-119		1.4169		0.00455358	0.000505331	0.00463137	0.000427458	-0.00717504	0.994275	1
AUDv1	959	12800	5951.78	590.135	8829	938.128	24.0251	1.52e-127	5.54e-127		1.48342		0.000567865	6.55624e-05	0.000604287	6.12943e-05	-0.0094329	0.992474	1
AUDv2/3	755	12900	10468.7	1062.9	15363.5	1479.06	24.0609	6.42e-128	2.35e-127		1.46757		0.000999179	0.000120001	0.001052	9.90856e-05	-0.0103334	0.991755	1
AUDv4	990	13000	5467.39	559.025	7591.02	713.558	20.5991	2.8e-94	7.98e-94		1.38842		0.000521881	6.33967e-05	0.000519865	4.86362e-05	0.000551233	0.99956	1
AUDv5	1023	13100	13785.5	1421.41	19816.1	1835.69	22.8062	3.98e-115	1.34e-114		1.43746		0.00131555	0.000158456	0.00135735	0.000127714	-0.0071547	0.994291	1
AUDv6a	520	13200	9237.29	918.971	12305.9	1135.65	18.6315	1.78e-77	4.52e-77		1.3322		0.000880709	9.73334e-05	0.000843039	8.06326e-05	0	1	1
AUDv6b	598	13300	2817.13	265.245	3719.69	345.418	18.7572	1.69e-78	4.32e-78		1.32038		0.000268394	2.64854e-05	0.000254822	2.44415e-05	0.00521953	0.995835	1
VIS	669	13400	248880	19176.9	343643	39450.8	22.0771	5.25e-108	1.65e-107		1.38075		0.0237071	0.0019095	0.023525	0.00262213	0.00739173	0.994102	1
VISal	402	14100	38941.4	3185.67	57049.6	5851.01	26.7116	3.45e-157	1.61e-156		1.46501		0.00370944	0.000318784	0.00390767	0.000405824	-0.020126	0.983943	1
VISal1	1074	14200	4794.02	440.266	7413.54	848.131	27.3412	1.38e-164	7.08e-164		1.54641		0.000456941	4.59724e-05	0.000508096	6.13057e-05	-0.0146414	0.988318	1
VISal2/3	905	14300	9950.22	884.701	15320.4	1706.66	27.7904	5.66e-170	2.99e-169		1.53971		0.000948217	9.13278e-05	0.00104974	0.000121493	-0.0201902	0.983892	1
VISal4	1114	14400	4421.01	380.976	6355.8	663.616	24.4988	1.52e-132	5.86e-132		1.43764		0.000421183	3.84584e-05	0.000435324	4.58749e-05	-0.00427614	0.996588	1
VISal5	233	14500	11281.4	931.923	16225.3	1699.07	25.0214	3.57e-138	1.45e-137		1.43823		0.00107445	9.12881e-05	0.00111103	0.000114396	-0.0069253	0.994474	1
VISal6a	601	14600	6452.85	532.091	8881.3	928.423	22.0331	1.39e-107	4.34e-107		1.37634		0.00061431	4.91611e-05	0.000608123	6.21862e-05	0.00156136	0.998754	1
VISal6b	649	14700	2041.93	171.18	2853.26	309.75	22.4089	3.22e-111	1.04e-110		1.39734		0.000194335	1.51521e-05	0.00019535	2.06903e-05	0	1	1
VISam	394	14800	34641.1	3827.17	48386.1	7082.24	17.0619	2.85e-65	6.46e-65		1.39678		0.00329701	0.000347027	0.00330648	0.000427763	-0.00102917	0.999179	1
VISam1	281	14900	5275.49	605.331	7091.13	1055.5	14.6915	7.31e-49	1.44e-48		1.34417		0.000502267	5.65359e-05	0.000484763	6.59212e-05	0.00490693	0.996085	1
VISam2/3	1066	15000	8257.1	936.323	11754.9	1767.31	17.5737	3.92e-69	9.23e-69		1.42361		0.000785864	8.49456e-05	0.000803532	0.000109672	-0.0039191	0.996873	1
VISam4	401	15100	3270.75	369.597	4625.44	701.608	17.2158	2.02e-66	4.65e-66		1.41418		0.000311256	3.31431e-05	0.000316124	4.30402e-05	-0.00171781	0.998629	1
VISam5	433	15200	9078.1	1000.28	12803.2	1973.22	17.1671	4.68e-66	1.07e-65		1.41033		0.000863964	9.01263e-05	0.000874788	0.000119497	-0.0022941	0.99817	1
VISam6a	1046	15300	6502.85	699.681	9067.33	1392.32	16.824	1.63e-63	3.64e-63		1.39436		0.000618879	6.28669e-05	0.000619376	8.28961e-05	-0.000124769	0.9999	1
VISam6b	441	15400	2256.82	241.323	3044.15	453.119	15.4524	7.27e-54	1.5e-53		1.34886		0.000214784	2.17189e-05	0.0002079	2.62991e-05	0.0029501	0.997646	1
VISl	409	15500	15635.5	1417.64	24401.9	2868.9	27.683	1.12e-168	5.89e-168		1.56067		0.00149004	0.000147715	0.0016729	0.000208772	-0.028927	0.976923	1
VISl1	421	15600	1743.53	173.355	2932.85	362.777	29.889	2.74e-196	1.75e-195		1.68214		0.000166272	1.8757e-05	0.000201111	2.66133e-05	-0.0162405	0.987043	1
VISl23	973	15700	4200.7	391.281	6949.95	894.064	29.3809	9.63e-190	5.83e-189		1.65447		0.000400503	4.21527e-05	0.000476598	6.54629e-05	-0.0229371	0.9817	1
VISl4	573	15800	1826.96	175.464	2802.57	359.619	24.6674	2.4e-134	9.48e-134		1.53401		0.000174131	1.83234e-05	0.000192157	2.60653e-05	-0.00837063	0.993321	1
VISl5	613	15900	4310.83	410.293	6635.52	811.498	25.7482	3.37e-146	1.45e-145		1.53927		0.000410678	4.11056e-05	0.000454828	5.80701e-05	-0.0133402	0.989356	1
VISl6a	74	16000	2656.24	264.157	3859.82	432.086	22.7399	1.81e-114	6.03e-114		1.45311		0.000253001	2.59966e-05	0.000264533	3.09959e-05	-0.00448955	0.996418	1
VISl6b	121	16100	897.185	94.4693	1221.13	133.641	18.3506	3.26e-75	8.12e-75		1.36107		8.54545e-05	9.28726e-06	8.36733e-05	9.48604e-06	0.00120757	0.999036	1
VISp	385	16200	121364	10337.3	162252	20686.9	17.9909	2.3e-72	5.54e-72		1.3369		0.0115603	0.00101024	0.0111098	0.00140343	0.0263416	0.978985	1
VISp1	593	16300	16329.3	1429.85	22226.9	3043.04	18.2735	1.35e-74	3.33e-74		1.36117		0.00155582	0.000143555	0.00152206	0.000207314	0.00536535	0.995719	1
VISp2/3	821	16400	34428.9	3005.86	46219.1	6153.7	17.7074	3.68e-70	8.75e-70		1.34245		0.00327987	0.00029729	0.00316528	0.000421527	0.0125715	0.98997	1
VISp4	721	16500	15371.1	1336.22	20876.8	2731.88	18.5455	8.87e-77	2.24e-76		1.35819		0.00146419	0.00013086	0.00142953	0.000185922	0.00567939	0.995469	1
VISp5	778	16600	32129	2722.74	42509.4	5559.07	17.0817	2.03e-65	4.61e-65		1.32309		0.00306027	0.000265189	0.00291045	0.000375631	0.0170593	0.986389	1
VISp6a	33	16700	18737.9	1580.57	24756.7	3058	17.5088	1.23e-68	2.88e-68		1.32121		0.00178439	0.000150064	0.00169488	0.000204808	0.0133494	0.989349	1
VISp6b	305	16800	4368.15	350.96	5663.25	653.295	17.2798	6.67e-67	1.55e-66		1.29649		0.000415724	3.04965e-05	0.000387618	4.27306e-05	0	1	1
VISpl	425	16900	13013.8	1413.92	18346.9	2463.29	18.0569	6.96e-73	1.71e-72		1.40981		0.00124098	0.000148997	0.00125746	0.000174238	-0.00291322	0.997676	1
VISpl1	750	17000	1727.26	186.613	2511.15	361.422	19.1989	3.78e-82	9.87e-82		1.45383		0.000164735	2.00468e-05	0.000172086	2.51206e-05	-0.00354716	0.99717	1
VISpl2/3	269	17100	3476.3	385.344	4949.85	709.639	17.9398	5.77e-72	1.39e-71		1.42389		0.000331515	4.07044e-05	0.000339254	4.98407e-05	-0.0026426	0.997892	1
VISpl4	869	17200	1425.88	160.97	2045.54	293.685	18.0256	1.23e-72	2.99e-72		1.43458		0.000135963	1.68429e-05	0.000140199	2.06941e-05	-0.00225595	0.9982	1
VISpl5	902	17300	3781.75	428.886	5346.77	724.301	17.6826	5.71e-70	1.35e-69		1.41383		0.0003606	4.46022e-05	0.00036648	5.14371e-05	0	1	1
VISpl6a	377	17400	2301.7	270.497	3121.62	426.922	15.138	9.09e-52	1.84e-51		1.35622		0.000219475	2.77525e-05	0.000213956	3.03193e-05	0.00233641	0.998136	1
VISpl6b	393	17500	300.889	36.3789	371.967	52.2698	10.3474	4.3e-25	7.06e-25		1.23623		2.86962e-05	3.74237e-06	2.54849e-05	3.63999e-06	0.00381857	0.996953	1
VISpm	533	17600	25284.2	2369.21	33206	6214.25	12.8425	9.48e-38	1.72e-37		1.31331		0.00240934	0.000241339	0.00227072	0.000409349	0.0178164	0.985785	1
VISpm1	805	17700	4757.96	430.472	6084.44	1083.97	12.0538	1.85e-33	3.26e-33		1.27879		0.000453194	4.2083e-05	0.00041564	6.84709e-05	0.0111791	0.991081	1
VISpm2/3	41	17800	8147.53	773.29	10874.7	2025.07	13.5499	7.93e-42	1.47e-41		1.33472		0.000776385	7.87038e-05	0.000743592	0.00013305	0.00740408	0.994092	1
VISpm4	501	17900	2345.19	231.572	3161.59	577.693	13.9996	1.57e-44	2.98e-44		1.34812		0.000223445	2.30783e-05	0.000216229	3.80592e-05	0.00303159	0.997581	1
VISpm5	565	18000	5651.18	550.075	7324.25	1509.63	11.3689	5.98e-30	1.02e-29		1.29606		0.000538601	5.6843e-05	0.000500987	0.000101039	0.0102472	0.991824	1
VISpm6a	257	18100	4102.94	414.363	5391	1039.81	12.3368	5.74e-35	1.02e-34		1.31394		0.000391087	4.27665e-05	0.000368958	7.02748e-05	0.0070579	0.994369	1
VISpm6b	469	18200	279.435	28.4008	370.066	68.4095	12.9112	3.89e-38	7.09e-38		1.32433		2.66312e-05	2.88664e-06	2.53125e-05	4.50218e-06	0.00160979	0.998716	1
ACA	31	18300	159891	32926.3	294736	39527.7	18.4635	4.06e-76	1.02e-75		1.84336		0.0151415	0.00279728	0.0201192	0.00214069	-0.237991	0.811888	1
ACAd	39	18900	73792.8	15257.8	138479	20301.7	19.0605	5.37e-81	1.39e-80		1.87659		0.00699128	0.00130778	0.00945146	0.00114508	-0.17239	0.863131	1
ACAd1	935	19000	21932.8	4487.52	41155.3	4939	694.708	0	0		1.87643		0.00207814	0.000395294	0.00280996	0.000256096	-0.0940523	0.925068	1
ACAd2/3	211	19100	25063.9	6446.97	48489.5	8413.1	14.4324	3.24e-47	6.31e-47		1.93464		0.00237236	0.000573695	0.0033087	0.000501054	-0.111778	0.911	1
ACAd5	1015	19200	18255.5	4805.75	32806.3	7489.87	14.1968	9.59e-46	1.85e-45		1.79707		0.00172844	0.000420548	0.00223666	0.000463044	-0.0723688	0.942308	1
ACAd6a	919	19300	7386.59	814.311	14012.7	2029.36	33.1021	2.77e-240	2.14e-239		1.89705		0.000702443	6.89396e-05	0.000958241	0.000128547	-0.0564241	0.955004	1
ACAd6b	927	19400	1154.07	140.903	2014.93	252.506	28.9958	7.43e-185	4.32e-184		1.74593		0.000109901	1.37835e-05	0.000137905	1.62703e-05	-0.0159267	0.987293	1
ACAv	48	19500	86098.1	17921.9	156258	20424.9	17.3818	1.13e-67	2.65e-67		1.81488		0.00815026	0.00151709	0.0106677	0.00109442	-0.164643	0.869225	1
ACAv1	588	19600	30694.9	5703.19	57337.3	6563.77	815.083	0	0		1.86797		0.00290756	0.000489062	0.00391799	0.000357169	-0.109877	0.912507	1
ACAv2/3	296	19700	28532.8	7122.81	53432.5	8027.42	789.317	0	0		1.87267		0.00269957	0.00062871	0.00364828	0.000464954	-0.10699	0.914797	1
ACAv5	772	19800	19404.6	5957.65	32520.8	7744.59	10.4935	9.25e-26	1.53e-25		1.67593		0.00183408	0.000526424	0.00221513	0.000473731	-0.0535003	0.957333	1
ACAv6a	810	19900	6282.6	1055.08	10874.4	1962.34	20.5853	3.71e-94	1.06e-93		1.73088		0.000596442	8.79706e-05	0.000743107	0.000124735	-0.0358621	0.971392	1
ACAv6b	819	20000	1183.19	166.601	2092.61	283.833	26.7389	1.66e-157	7.81e-157		1.76862		0.00011261	1.57595e-05	0.000143204	1.82826e-05	-0.0171367	0.986328	1
PL	972	20100	46611.8	10457.1	99310.1	16166.9	21.2428	3.84e-100	1.13e-99		2.13058		0.00441492	0.000904314	0.00677629	0.000941843	-0.201599	0.84023	1
PL1	171	20200	12246.2	3210.22	25587	3280.3	12.5124	6.39e-36	1.14e-35		2.08938		0.00115934	0.000289225	0.00174709	0.000179424	-0.098399	0.921616	1
PL2	195	20300	5144.83	1356.36	11203	1401.07	13.7872	3.04e-43	5.7e-43		2.17752		0.000487053	0.000122262	0.000765032	7.64339e-05	-0.0710066	0.943393	1
PL2/3	304	20400	13274.9	3586.42	28564.4	5094.49	17.3699	1.39e-67	3.24e-67		2.15177		0.0012564	0.00031883	0.00194859	0.00030614	-0.110466	0.91204	1
PL5	363	20500	11079.9	2936.65	23326.7	5733.17	17.7344	2.28e-70	5.43e-70		2.10532		0.001049	0.000256264	0.00158908	0.000354443	-0.0949238	0.924375	1
PL6a	84	20600	4512.67	376.787	9956.84	1735.44	40.8544	0	0		2.20642		0.00042947	3.36934e-05	0.000680455	0.00010948	0	1	1
PL6b	132	20700	353.352	37.0388	672.148	86.7803	35.597	1.56e-277	1.38e-276		1.9022		3.36512e-05	3.66107e-06	4.60357e-05	5.97498e-06	-0.0124725	0.990049	1
ORB	714	20800	92608.3	9092.13	197597	23517	44.4219	0	0		2.13369		0.00880147	0.000679799	0.0135014	0.00131902	-0.284225	0.776238	1
ORBl	723	21400	33192.8	2516.78	75919.7	8915.07	55.754	0	0		2.28723		0.00316252	0.000262642	0.00519514	0.000575689	-0.201244	0.840508	1
ORBl1	448	21500	6219.56	448.599	13949.3	1786.59	52.9436	0	0		2.2428		0.000592495	4.60988e-05	0.000954103	0.000111931	-0.0831758	0.933712	1
ORBl2/3	412	21600	12814.5	961.26	29533.8	3744.04	54.024	0	0		2.30471		0.00122079	9.85546e-05	0.00202074	0.000241398	-0.127199	0.898783	1
ORBl5	630	21700	9603.5	764.938	22365.2	2732.83	54.5632	0	0		2.32886		0.00091506	8.00303e-05	0.00153064	0.000179196	-0.112722	0.910251	1
ORBl6a	440	21800	4546.01	381.46	10047.9	1127.21	52.4819	0	0		2.21028		0.000433291	4.11012e-05	0.000688055	7.71343e-05	-0.0687901	0.945157	1
ORBl6b	488	21900	9.2037	1.67867	23.5738	4.20103	22.8011	4.47e-115	1.5e-114		2.56134		8.7639e-07	1.62396e-07	1.61372e-06	2.82445e-07	-0.00424071	0.996616	1
ORBm	731	22000	27576.7	6331.72	57762.7	9020.88	20.401	1.64e-92	4.58e-92		2.09462		0.00261198	0.000550187	0.00394111	0.000518347	-0.148199	0.882186	1
ORBm1	484	22100	6547.2	1854.74	13124.5	1477.43	426.086	0	0		2.00459		0.000619987	0.000168764	0.000896519	7.80509e-05	-0.0639902	0.948978	1
ORBm2	524	22200	2782.86	797.146	5593.41	694.768	279.026	0	0		2.00995		0.000263367	7.23587e-05	0.000381976	3.8182e-05	-0.042079	0.966436	1
ORBm2/3	582	22300	9628.57	2647.35	20281	3379.32	16.7153	1.01e-62	2.26e-62		2.10633		0.00091102	0.000235575	0.00138352	0.000200503	-0.0890548	0.929038	1
ORBm5	620	22400	6493.7	1571.75	13614.6	3415.46	18.7272	2.97e-78	7.58e-78		2.09658		0.000615306	0.000136463	0.000927346	0.000211375	-0.0717062	0.942836	1
ORBm6a	910	22500	2124.33	159.185	5149.3	978.187	44.203	0	0		2.42396		0.000202301	1.57399e-05	0.00035175	6.16134e-05	-0.0575544	0.954104	1
ORBvl	746	22700	31838.8	2872.51	63914.9	8271.75	41.2715	0	0		2.00745		0.00302697	0.000214899	0.0043651	0.000458585	-0.140235	0.888474	1
ORBvl1	969	22800	7785.48	1281.68	15870.8	2534.61	26.7348	1.85e-157	8.69e-157		2.03851		0.000738618	0.000105349	0.0010826	0.000144437	-0.0726749	0.942065	1
ORBvl2/3	288	22900	13723.4	1332.5	27760.8	4034.83	37.8906	0	0		2.02288		0.00130455	0.000101915	0.00189519	0.000229109	-0.0941104	0.925021	1
ORBvl5	1125	23000	5177.67	371.873	11112	1444.77	49.6547	0	0		2.14615		0.000492978	3.52806e-05	0.000759606	8.67746e-05	0	1	1
ORBvl6a	608	23100	5127.15	404.371	9117.8	821.895	43.4335	0	0		1.77834		0.000488428	4.2116e-05	0.000624022	5.12047e-05	-0.0364292	0.97094	1
ORBvl6b	680	23200	25.1574	3.37435	53.5902	7.69064	29.1284	1.57e-186	9.26e-186		2.13019		2.39618e-06	3.30523e-07	3.67145e-06	5.38499e-07	-0.0046755	0.99627	1
AI	95	23300	95603.5	7034.06	166979	14682.8	44.3381	0	0		1.74657		0.00910824	0.000725274	0.0114343	0.000999186	-0.145295	0.884478	1
AId	104	23400	45545	3751.57	93083	9558.66	49.7074	0	0		2.04376		0.00433812	0.00036865	0.00637431	0.000657659	-0.177394	0.859199	1
AId1	996	23500	10139.8	794.517	20326.9	2006.24	50.6443	0	0		2.00467		0.000965941	8.03482e-05	0.0013916	0.000133892	-0.0789867	0.937043	1
AId2/3	328	23600	19490.3	1583.28	41986	4621.73	51.9451	0	0		2.1542		0.00185663	0.000157802	0.00287534	0.000319914	-0.133791	0.893567	1
AId5	1101	23700	11456	1024.42	23353.5	2596.45	45.7036	0	0		2.03853		0.00109103	9.83735e-05	0.00159951	0.00018084	-0.0883843	0.929571	1
AId6a	783	23800	4138.19	406.86	7006.08	686.663	33.6898	8.15e-249	6.51e-248		1.69303		0.000394008	3.79953e-05	0.00047977	4.69967e-05	-0.0259328	0.979311	1
AId6b	831	23900	320.583	43.7749	410.541	42.4423	12.5033	7.16e-36	1.28e-35		1.28061		3.05073e-05	4.01786e-06	2.80986e-05	2.74389e-06	0.00276163	0.997797	1
AIp	111	24000	28928.4	2918.63	37920.2	3838.07	16.8704	7.43e-64	1.67e-63		1.31083		0.00275845	0.000314528	0.00259674	0.000262474	0.0194274	0.9845	1
AIp1	120	24100	7850.67	857.318	10350.2	1045.37	16.4038	1.8e-60	3.92e-60		1.31838		0.00074853	9.06769e-05	0.000708636	7.00016e-05	0.00919172	0.992666	1
AIp2/3	163	24200	8062.23	840.757	10771.8	1102.45	17.6082	2.13e-69	5.03e-69		1.33608		0.000768822	9.07595e-05	0.000737622	7.52196e-05	0.00707702	0.994353	1
AIp5	344	24300	7486.81	776.026	9822.41	1045.52	16.3247	6.58e-60	1.42e-59		1.31196		0.000713988	8.36327e-05	0.000672703	7.22965e-05	0.0097476	0.992223	1
AIp6a	314	24400	5528.68	566.159	6975.82	721.629	14.2896	2.54e-46	4.94e-46		1.26175		0.000527107	5.96165e-05	0.000477777	5.02897e-05	0.0136423	0.989115	1
AIv	119	24600	21130.2	2097.79	35975.4	3356.05	34.554	1.24e-261	1.03e-260		1.70256		0.00201168	0.000194267	0.00246323	0.000225381	-0.0603531	0.951874	1
AIv1	704	24700	4010	405.166	6471.21	632.066	30.1831	3.95e-200	2.57e-199		1.61377		0.000381766	3.77048e-05	0.000442944	4.12215e-05	-0.0189896	0.984849	1
AIv2/3	694	24800	8326.37	948.303	14120.3	1340.85	31.1702	2.7e-213	1.88e-212		1.69585		0.000792609	8.74442e-05	0.000966797	9.00448e-05	-0.0371221	0.970388	1
AIv5	800	24900	6489.96	634.718	11277.3	1092.33	35.6839	7.03e-279	6.29e-278		1.73766		0.000617913	5.90115e-05	0.000772213	7.39799e-05	-0.0370422	0.970451	1
AIv6a	675	25000	2296.5	202.168	4087.13	429.857	38.3085	0	0		1.77972		0.000218691	1.92497e-05	0.000279938	2.98785e-05	-0.0245804	0.98039	1
AIv6b	699	25100	7.33333	1.29701	19.459	2.69922	21.2695	2.17e-100	6.44e-100		2.6535		6.98966e-07	1.28989e-07	1.33443e-06	1.9698e-07	-0.00404699	0.996771	1
RSP	254	25200	230028	23133.2	318229	41502.7	17.8334	3.89e-71	9.32e-71		1.38344		0.0218485	0.00160804	0.0217149	0.0021347	0.00565072	0.995491	1
RSPagl	894	25300	18936.5	1947.46	24411.1	3877.88	12.751	3.08e-37	5.56e-37		1.2891		0.00180438	0.000194282	0.00166738	0.000233767	0.0204129	0.983714	1
RSPagl1	671	25400	3336.45	369.174	4465.93	704.608	14.2216	6.73e-46	1.3e-45		1.33853		0.000317989	3.70349e-05	0.000304991	4.23782e-05	0.00458464	0.996342	1
RSPagl2/3	965	25500	5459.56	587.642	7105.1	1148.15	12.8443	9.26e-38	1.68e-37		1.30141		0.00052027	5.86741e-05	0.000485296	6.93858e-05	0.00968975	0.992269	1
RSPagl5	774	25600	5235.8	550.38	6729.49	1101.94	12.2831	1.12e-34	1.98e-34		1.28529		0.000498927	5.50449e-05	0.000459701	6.70312e-05	0.0111202	0.991128	1
RSPagl6a	906	25700	4214.51	408.052	5229.07	873.04	10.8145	2.94e-27	4.9e-27		1.24073		0.000401467	4.00644e-05	0.000357189	5.34581e-05	0.0140725	0.988772	1
RSPagl6b	279	25800	690.213	66.936	881.557	139.515	12.6217	1.6e-36	2.88e-36		1.27723		6.57284e-05	6.41036e-06	6.02063e-05	8.31965e-06	0.00431725	0.996555	1
RSPd	879	25900	73352.7	6670.49	103095	14757	18.928	6.71e-80	1.73e-79		1.40546		0.00697388	0.000505531	0.00703851	0.000847102	-0.00482365	0.996151	1
RSPd1	442	26000	16634.3	2039.65	24159.3	3637.27	17.2413	1.3e-66	3e-66		1.45238		0.00157931	0.000154983	0.00164917	0.000208297	0	1	1
RSPd2/3	434	26100	21426.5	2266.84	30533.1	4700.7	17.6258	1.56e-69	3.69e-69		1.42501		0.00203614	0.000174712	0.00208432	0.000274009	-0.00663816	0.994704	1
RSPd5	610	26300	22209.7	2020.75	31150.8	5157.12	17.208	2.31e-66	5.31e-66		1.40258		0.00211227	0.000162453	0.00212613	0.000308845	-0.00188035	0.9985	1
RSPd6a	274	26400	11696.7	903.325	15320.4	2019.6	16.8634	8.37e-64	1.88e-63		1.3098		0.00111415	9.00114e-05	0.00104685	0.000120299	0.0127263	0.989846	1
RSPd6b	330	26500	1385.48	121.984	1930.97	263.659	19.314	4.09e-83	1.08e-82		1.39372		0.000132008	1.24329e-05	0.000132037	1.66032e-05	-1.59094e-05	0.999987	1
RSPv	886	26600	137739	16881.6	190723	27099.2	15.1585	6.66e-52	1.35e-51		1.38468		0.0130703	0.00122516	0.013009	0.00141569	0.00334823	0.997329	1
RSPv1	542	26700	33990.6	4344.39	47961.8	6407.67	14.7264	4.37e-49	8.61e-49		1.41103		0.00322541	0.000341796	0.00327192	0.000322823	-0.00510035	0.995931	1
RSPv2	606	26800	13446.2	1748.55	19214.1	2637.64	15.1833	4.57e-52	9.29e-52		1.42897		0.00127582	0.000136884	0.00131078	0.000135419	-0.00607969	0.995149	1
RSPv2/3	430	26900	27211.4	3792.8	37335.5	5240.31	13.2013	8.63e-40	1.58e-39		1.37205		0.00258132	0.000296187	0.00254741	0.000276885	0.00417694	0.996667	1
RSPv5	687	27000	43790.2	7356.1	59978.9	11187.9	10.9203	9.22e-28	1.55e-27		1.36969		0.00415193	0.000589648	0.00409023	0.000657272	0.00599509	0.995217	1
RSPv6a	590	27100	17706.1	1523.73	23996.7	4707.66	14.0174	1.22e-44	2.33e-44		1.35528		0.00168397	0.000118677	0.00163599	0.000282977	0.0073378	0.994145	1
RSPv6b	622	27200	1594.12	125.924	2236.48	393.792	17.3275	2.92e-67	6.78e-67		1.40295		0.000151818	1.23145e-05	0.000152688	2.41874e-05	-0.000440343	0.999649	1
PTLp	22	27300	71450.2	5723.43	104165	10683.2	26.6829	7.44e-157	3.46e-156		1.45786		0.00680373	0.000541115	0.007127	0.000668034	-0.0242603	0.980645	1
PTLp1	532	27400	9875.3	860.287	14406.6	1560.01	25.0378	2.37e-138	9.64e-138		1.45886		0.000940749	8.4993e-05	0.000986061	0.000102483	-0.00914389	0.992704	1
PTLp2/3	241	27500	17988.7	1488.11	26416.7	2838.14	26.1773	4.82e-151	2.13e-150		1.46852		0.00171312	0.000142278	0.0018078	0.000184066	-0.0141394	0.988719	1
PTLp4	635	27600	6091.71	496.013	8956.62	941.141	26.7585	9.84e-158	4.64e-157		1.4703		0.000580082	4.69727e-05	0.000612881	6.01039e-05	-0.00841595	0.993285	1
PTLp5	683	27700	20458.9	1624.76	29995	3202.08	26.6535	1.63e-156	7.55e-156		1.46611		0.00194795	0.000151117	0.00205182	0.000196502	-0.0145522	0.988389	1
PTLp6a	308	27800	12501.9	981.276	17929.5	1999.45	24.7962	9.86e-136	3.94e-135		1.43414		0.00119024	9.03619e-05	0.00122645	0.000122199	-0.00651649	0.994801	1
PTLp6b	340	27900	4533.69	346.174	6460.2	701.595	24.9612	1.61e-137	6.49e-137		1.42493		0.000431588	3.13802e-05	0.000442002	4.37001e-05	-0.0031162	0.997514	1
TEa	541	28000	66634	5959.37	101731	8461.29	30.3311	4.46e-202	2.92e-201		1.52671		0.00635762	0.000686167	0.00696734	0.000578199	-0.0469222	0.962575	1
TEa1	97	28100	10156.4	974.823	15605.2	1605.28	26.9834	2.32e-160	1.11e-159		1.53649		0.000969335	0.000112187	0.00106812	0.000104593	-0.0194488	0.984483	1
TEa2/3	1127	28200	15590.6	1476.74	24434.7	2323.7	29.588	2.13e-192	1.32e-191		1.56727		0.00148802	0.00017096	0.00167336	0.00015752	-0.0293286	0.976602	1
TEa4	234	28300	5641.7	524.266	8786.77	809.233	29.9003	1.95e-196	1.25e-195		1.55747		0.000538434	6.09637e-05	0.000601801	5.53959e-05	-0.0166906	0.986683	1
TEa5	289	28400	21026.8	1940.54	32038.4	2621.82	29.704	6.81e-194	4.27e-193		1.5237		0.00200621	0.000221578	0.00219445	0.000181702	-0.0257979	0.979419	1
TEa6a	729	28500	10700.5	971.166	15570	1091.01	28.1716	1.3e-174	7.03e-174		1.45507		0.00102031	0.000106201	0.00106674	7.99145e-05	-0.00899959	0.992819	1
TEa6b	786	28600	3517.92	311.438	5295.57	352.151	31.7958	7.41e-222	5.29e-221		1.50532		0.000335308	3.30463e-05	0.000362874	2.68795e-05	-0.00926029	0.992611	1
PERI	922	28700	25993.3	2354.15	37140.7	2491.05	26.983	2.34e-160	1.12e-159		1.42886		0.00247982	0.000268657	0.00254414	0.000179242	-0.00802707	0.993595	1
PERI6a	335	28800	3319.76	293.025	5010.16	290.574	33.1349	9.34e-241	7.27e-240		1.50919		0.000316531	3.23354e-05	0.000343423	2.46114e-05	0	1	1
PERI6b	368	28900	1396.08	122.138	2041.64	118.356	31.058	8.89e-212	6.09e-211		1.46241		0.000133044	1.28229e-05	0.000139945	1.01001e-05	-0.00370053	0.997047	1
PERI1	540	29000	5687.19	572.607	7860.18	663.432	21.306	1e-100	2.97e-100		1.38208		0.000542791	6.49197e-05	0.000537962	4.12297e-05	0.00129632	0.998966	1
PERI5	692	29100	7598.92	711.777	10918.4	695.364	27.1273	4.69e-162	2.35e-161		1.43684		0.000724805	7.94356e-05	0.000748195	5.46331e-05	-0.0053929	0.995697	1
PERI2/3	888	29200	7991.36	781.834	11310.3	834.981	24.1846	3.23e-129	1.19e-128		1.41532		0.000762648	8.92796e-05	0.000774618	5.78226e-05	-0.00269848	0.997847	1
ECT	895	29300	63317.9	5384.81	95272.2	8909.72	28.9937	7.91e-185	4.58e-184		1.50467		0.00604034	0.000625757	0.00652384	0.000596797	-0.0382828	0.969462	1
ECT1	836	29400	12894.6	1182.39	19521.1	2006.48	27.0643	2.59e-161	1.28e-160		1.5139		0.00123051	0.000137244	0.0013361	0.000128434	-0.0185042	0.985237	1
ECT2/3	427	29500	20612.9	1830.95	31065.4	3271.82	26.9864	2.13e-160	1.04e-159		1.50708		0.00196697	0.000214368	0.00212712	0.000219215	-0.0222163	0.982275	1
ECT5	988	29600	19125.8	1645.7	28690.8	2675.41	28.6567	1.32e-180	7.45e-180		1.50011		0.0018242	0.000187851	0.00196492	0.000182735	-0.0202865	0.983815	1
ECT6a	977	29700	8346.26	714.825	12541.4	981.173	30.8181	1.5e-208	1.02e-207		1.50264		0.000795774	7.91483e-05	0.00085904	6.85047e-05	-0.0138025	0.988988	1
ECT6b	1045	29800	2338.3	209.084	3453.49	203.661	31.068	6.53e-212	4.5e-211		1.47693		0.000222899	2.24196e-05	0.00023666	1.62163e-05	0	1	1
OLF	698	29900	726170	44946.9	1.04923e+06	139294	24.6087	1.02e-133	3.97e-133		1.44488		0.0691095	0.00360916	0.0716279	0.00751179	-0.0594198	0.952618	1
MOB	507	30000	155567	27104.7	227109	85339.4	8.63234	6.01e-18	9.5e-18		1.45987		0.0147908	0.00246321	0.0154087	0.00539899	-0.0314869	0.974881	1
MOBgl	212	30100	38834.3	9969.32	58687.4	21727.9	7.80504	5.95e-15	9.23e-15		1.51122		0.00368762	0.000923035	0.00398164	0.00137179	-0.0297973	0.976229	1
MOBgr	220	30200	42380.7	4955.74	56945.2	23088.3	6.98523	2.84e-12	4.36e-12		1.34366		0.00403778	0.00048223	0.00386349	0.0014737	0.0172585	0.98623	1
MOBipl	228	30300	7079.97	1005.12	10183.3	4529.4	7.51124	5.86e-14	9.06e-14		1.43833		0.000673922	9.31635e-05	0.000690212	0.000290676	-0.0039007	0.996888	1
MOBmi	236	30400	7490.65	1166.22	11031.3	4402.88	8.67777	4.04e-18	6.38e-18		1.47267		0.000712387	0.000105374	0.000748352	0.000281014	-0.00833655	0.993348	1
MOBopl	244	30500	42219.9	8587.31	63522.4	22502	9.1924	3.84e-20	6.1e-20		1.50456		0.00401032	0.000776592	0.0043114	0.00142064	-0.0292833	0.976639	1
AOB	151	30600	14032	2019.51	15742.7	7723.93	2.16542	0.0303559	0.0429713		1.12192		0.00133907	0.000206289	0.00106972	0.000507835	0.047622	0.962018	1
AOBgl	188	30700	2674.67	321.734	3522.11	1628.8	5.57944	2.41e-08	3.57e-08		1.31684		0.000255008	3.24361e-05	0.000239407	0.00010663	0.00616716	0.995079	1
AOBgr	196	30800	3362.51	537.18	3073.82	1918.44	-1.26217	0.206887	0.289787		0.914145		0.000321039	5.46733e-05	0.000208431	0.000127163	0.0416628	0.966768	1
AOBmi	204	30900	2957.07	342.844	3496.93	1624.02	3.3557	0.000791649	0.00114636		1.18257		0.000281992	3.51759e-05	0.000237642	0.00010624	0.0169577	0.98647	1
AON	159	31000	91693.3	6129.15	155003	21651.5	33.067	8.87e-240	6.82e-239		1.69045		0.00872421	0.000468	0.0105769	0.001163	-0.119167	0.905143	1
AONd	167	31100	5407.12	397.301	9702.46	1130.14	41.0076	0	0		1.79439		0.000514895	3.83997e-05	0.000663393	6.47195e-05	-0.0387819	0.969064	1
AONe	175	31200	5732.17	456.958	8938.18	2236.12	14.8312	9.21e-50	1.82e-49		1.5593		0.000545809	4.36369e-05	0.000610307	0.000143013	-0.0168717	0.986539	1
AONl	183	31300	12261.2	927.618	19172.8	2491.26	28.6991	3.92e-181	2.22e-180		1.5637		0.00116733	8.63303e-05	0.00131039	0.000143447	-0.0255691	0.979601	1
AONm	191	31400	15150.5	1772.09	27926	6881.45	21.4724	2.82e-102	8.57e-102		1.84324		0.00143937	0.000136658	0.00189932	0.000416401	-0.0714442	0.943044	1
AONpv	199	31500	13796.2	1082.4	21660.4	3273.18	26.1306	1.64e-150	7.22e-150		1.57003		0.00131326	9.76622e-05	0.00147841	0.000186276	-0.0278126	0.977812	1
AON1	160	31600	37156.2	2526.92	64081	8133.87	36.2779	3.61e-288	3.31e-287		1.72464		0.00353499	0.000189302	0.00437423	0.000427879	-0.084421	0.932722	1
TT	589	31800	41354	10183.6	76431.2	14418.1	14.9006	3.27e-50	6.48e-50		1.84822		0.00391534	0.000890756	0.00520472	0.000825789	-0.121221	0.903516	1
TTd1	1034	32100	9077.24	2471.94	16191	2441.24	10.8866	1.34e-27	2.24e-27		1.78369		0.000859417	0.000222054	0.00110418	0.000132632	-0.0495101	0.960513	1
TTd2	1042	32200	10056	2488.75	18583.8	3202.26	14.7928	1.63e-49	3.22e-49		1.84804		0.00095189	0.000218624	0.00126627	0.000179063	-0.0599324	0.952209	1
TTd3	1050	32300	7726.31	1772.96	14362.6	3015.54	16.422	1.33e-60	2.91e-60		1.85892		0.000731574	0.00015197	0.000977385	0.00017566	-0.0533988	0.957414	1
TTd4	1059	32400	2090.71	454.651	4038.89	1067.05	17.2021	2.56e-66	5.87e-66		1.93182		0.000198025	3.81479e-05	0.000274425	6.41612e-05	-0.0316178	0.974777	1
TTv1	1067	32700	5857.52	1685.54	10700.8	2085.86	11.3877	4.81e-30	8.23e-30		1.82685		0.000554523	0.000151092	0.000728833	0.000123309	-0.0436624	0.965173	1
TTv2	1075	32800	4407.6	1165.13	8404.56	2049.43	13.8067	2.32e-43	4.36e-43		1.90683		0.000417414	0.000102966	0.000571621	0.000125699	-0.0440846	0.964837	1
TTv3	1082	32900	2138.64	569.366	4149.54	1113.3	13.9912	1.76e-44	3.35e-44		1.94027		0.000202495	5.0073e-05	0.000282009	6.90453e-05	-0.0325015	0.974072	1
DP	814	33000	7427.69	1629.98	14331.6	2539.28	18.4566	4.61e-76	1.15e-75		1.92948		0.000703337	0.00013908	0.000976254	0.000140759	-0.0599067	0.95223	1
DP1	496	33100	2041.81	553.702	3907.3	529.347	219.631	0	0		1.91364		0.000193324	5.00559e-05	0.00026667	2.79256e-05	-0.0307557	0.975464	1
DP2/3	360	33300	2742.23	669.013	5327.11	897.069	16.5677	1.19e-61	2.63e-61		1.94262		0.000259478	5.83523e-05	0.00036306	4.98709e-05	-0.0373594	0.970198	1
DP5	646	33400	2130.45	526.467	4101.36	1037.41	15.9557	2.6e-57	5.5e-57		1.92511		0.00020172	4.52822e-05	0.000278766	6.23807e-05	-0.0316133	0.97478	1
DP6a	267	33500	513.204	49.1378	995.803	256.954	24.7037	9.76e-135	3.87e-134		1.94037		4.88149e-05	4.12221e-06	6.7758e-05	1.54433e-05	-0.0157834	0.987407	1
PIR	961	33600	277308	18628	385875	34420.1	27.1854	9.67e-163	4.89e-162		1.3915		0.0264213	0.0020054	0.0264294	0.00234582	-0.000314307	0.999749	1
PIR1	276	33800	102323	7235.57	139558	12194.2	25.186	5.7e-140	2.36e-139		1.3639		0.00975017	0.000782371	0.0095575	0.000816673	0.0122261	0.990245	1
PIR2	284	33900	79022.1	5365.41	112101	9901.36	28.791	2.78e-182	1.59e-181		1.41861		0.00752842	0.00056669	0.00767685	0.000661592	-0.010643	0.991508	1
PIR3	291	34000	95963.2	6269.77	134216	12697.7	27.043	4.62e-161	2.26e-160		1.39862		0.00914267	0.000675947	0.0091951	0.000890716	-0.00341939	0.997272	1
NLOT	619	34100	9340.3	857.679	10042	965.048	4.90259	9.46e-07	1.39e-06		1.07513		0.000888763	7.3779e-05	0.000688097	6.79492e-05	0.0437309	0.965119	1
NLOT1	260	34300	3865.33	359.442	4221.23	398.479	5.95472	2.61e-09	3.9e-09		1.09207		0.000367792	3.09236e-05	0.000289294	2.86582e-05	0.0265372	0.978829	1
NLOT2	268	34400	3183.67	290.405	3434.28	336.703	5.10844	3.25e-07	4.8e-07		1.07872		0.000302908	2.45107e-05	0.000235317	2.35797e-05	0.0252201	0.979879	1
NLOT3	1139	34500	2291.3	218.926	2386.51	254.061	2.58769	0.00966233	0.0137918		1.04155		0.000218063	1.94609e-05	0.000163486	1.73901e-05	0	1	1
COA	631	34600	61326.9	4540.72	73746.2	7291.74	13.9082	5.65e-44	1.07e-43		1.20251		0.00583993	0.000437906	0.00505285	0.000517493	0.0658718	0.94748	1
COAa	639	34700	13943.6	1200.09	14613.2	1338.03	3.35125	0.000804478	0.00116353		1.04803		0.00132803	0.000117626	0.00100161	9.81903e-05	0.0583912	0.953437	1
COAa1	192	34800	6507.72	557.29	6847.05	598.184	3.71531	0.000202956	0.000294963		1.05214		0.000619834	5.49538e-05	0.000469317	4.44405e-05	0.0393914	0.968578	1
COAa2	200	34900	7435.85	650.879	7766.18	754.686	2.99657	0.00273035	0.00392059		1.04442		0.000708197	6.34248e-05	0.00053229	5.47119e-05	0.0431086	0.965615	1
COAp	647	35100	47374.4	3601.9	59118.9	6310.08	15.8766	9.2e-57	1.93e-56		1.24791		0.00451105	0.000344186	0.00405028	0.000442648	0.0436235	0.965204	1
COApl	655	35200	24248.6	1980.63	29102.3	3153.98	12.553	3.83e-36	6.86e-36		1.20016		0.00230863	0.000184681	0.00199364	0.000218818	0.0419412	0.966546	1
COApl1	216	35500	6908.03	559.78	8618.95	844.479	15.9209	4.54e-57	9.56e-57		1.24767		0.000657937	5.52544e-05	0.00059066	6.11089e-05	0.0166787	0.986693	1
COApl2	224	35600	8223.14	658.511	9768.72	1047.81	11.9958	3.74e-33	6.56e-33		1.18796		0.000783098	6.38017e-05	0.000669319	7.37832e-05	0.0260518	0.979216	1
COApl3	232	35700	9117.43	830.22	10714.6	1346.2	9.86409	5.96e-23	9.61e-23		1.17518		0.000867599	7.23799e-05	0.000733656	9.00753e-05	0.0291832	0.976718	1
COApm	663	35800	23125.8	1748.81	30016.7	3408.65	18.0921	3.68e-73	9.05e-73		1.29797		0.00220241	0.000171831	0.00205665	0.000240652	0.019625	0.984343	1
COApm1	240	36100	5065.13	371.217	6885.34	786.552	21.4276	7.38e-102	2.22e-101		1.35936		0.000482522	3.83486e-05	0.000471995	5.7606e-05	0.00300369	0.997603	1
COApm2	248	36200	5665.9	414.536	7495.77	856.495	19.5682	2.89e-85	7.71e-85		1.32296		0.000539704	4.22466e-05	0.000513676	6.1252e-05	0.00705609	0.99437	1
COApm3	256	36300	12394.7	984.843	15635.5	1806.99	15.6533	3.15e-55	6.57e-55		1.26147		0.00118019	9.33365e-05	0.00107097	0.000124471	0.0201808	0.983899	1
PAA	788	36400	14937.7	1214.18	18136.8	2105.07	12.7258	4.25e-37	7.67e-37		1.21416		0.00142273	0.00012194	0.00124279	0.000147546	0.030467	0.975695	1
PAA1	408	36600	5942.55	479.051	7353.72	807.094	14.3764	7.28e-47	1.42e-46		1.23747		0.000566127	4.98029e-05	0.000503979	5.76137e-05	0.0166319	0.98673	1
PAA2	416	36700	4168.84	333.268	5080.15	586.608	13.0643	5.27e-39	9.62e-39		1.2186		0.000397146	3.45128e-05	0.000348181	4.17409e-05	0.0156827	0.987488	1
PAA3	424	36800	4826.28	428.831	5702.9	755.491	9.95173	2.48e-23	4.02e-23		1.18164		0.000459459	4.01336e-05	0.000390627	5.12103e-05	0.0205918	0.983571	1
TR	566	36900	25321.8	2020.25	32246.1	3892.11	15.6478	3.44e-55	7.14e-55		1.27346		0.0024134	0.000227957	0.00220774	0.000258038	0.0265414	0.978825	1
TR1	1140	37100	8873.67	746.317	11320.8	1416.64	15.0821	2.12e-51	4.26e-51		1.27577		0.000846089	8.68321e-05	0.000775132	9.49329e-05	0.0154618	0.987664	1
TR3	1142	37300	16448.1	1291.18	20925.3	2509.56	15.7705	4.97e-56	1.04e-55		1.27221		0.00156732	0.000142134	0.00143261	0.000165464	0.0215751	0.982787	1
HPF	1089	37400	823904	45116	1.19821e+06	72626.6	41.0717	0	0		1.4543		0.0784214	0.00375123	0.0820217	0.00429577	-0.0796063	0.93655	1
HIP	1080	37500	439818	29611.7	655493	42637.9	37.9884	0	0		1.49037		0.0418179	0.00157784	0.0448685	0.00253875	-0.0919174	0.926764	1
CA	375	37600	310513	21902.8	450964	28747.6	34.7217	3.71e-264	3.11e-263		1.45232		0.0295228	0.001256	0.0308763	0.00184093	-0.0487735	0.9611	1
CA1	382	37700	179252	11944.9	266825	17917.1	37.4084	2.85e-306	2.78e-305		1.48855		0.0170492	0.000792064	0.0182665	0.00112455	0	1	1
CA1slm	391	37800	46859.7	3559.89	70518.9	5069.14	34.7404	1.93e-264	1.63e-263		1.50489		0.00445554	0.000232763	0.00482842	0.000332663	-0.0343543	0.972595	1
CA1so	399	37900	37744.2	2358.69	55268.9	4265.73	35.0193	1.14e-268	9.87e-268		1.4643		0.00359008	0.000147709	0.00378135	0.000240286	-0.0197399	0.984251	1
CA1sp	407	38000	37577.2	2532	55987	3409.81	38.5495	0	0		1.48992		0.0035758	0.000204728	0.00383426	0.000233389	-0.0266353	0.978751	1
CA1sr	415	38100	57070.4	3842.67	85050.6	5922.1	36.7718	5.22e-296	4.89e-295		1.49027		0.00542779	0.000249086	0.00582251	0.000375775	-0.0330135	0.973664	1
CA2	423	38200	15666	1264.86	22117.5	1796.45	27.1581	2.03e-162	1.02e-161		1.41181		0.00148847	6.44859e-05	0.00151333	0.000103951	-0.00401081	0.9968	1
CA2slm	431	38300	3604.75	323.823	5181.87	421.684	26.9271	1.06e-159	5.05e-159		1.43751		0.00034243	1.81932e-05	0.000354698	2.62943e-05	-0.00411243	0.996719	1
CA2so	438	38400	4111.71	287.647	5648.41	446.58	27.365	7.16e-165	3.7e-164		1.37374		0.000390838	1.40146e-05	0.00038659	2.751e-05	0	1	1
CA2sp	446	38500	2856.87	216.077	3990.21	322.51	27.3295	1.9e-164	9.71e-164		1.39671		0.000271497	1.08894e-05	0.000273026	1.87747e-05	-0.000578658	0.999538	1
CA2sr	454	38600	5092.68	468.785	7296.97	658.938	25.1212	2.92e-139	1.19e-138		1.43284		0.000483701	2.68633e-05	0.000499011	3.57217e-05	-0.00432149	0.996552	1
CA3	463	38700	115596	10682.5	162021	10883.9	25.9751	9.46e-149	4.15e-148		1.40162		0.0109852	0.000695856	0.0110964	0.000746601	-0.00661326	0.994723	1
CA3slm	471	38800	1555.44	122.804	2221.84	218.168	26.5555	2.22e-155	1.02e-154		1.42843		0.000147869	7.80134e-06	0.000152147	1.46006e-05	-0.00218489	0.998257	1
CA3slu	479	38900	7066.91	643.58	10182.1	721.213	28.0628	2.79e-173	1.49e-172		1.44082		0.000671615	4.19801e-05	0.000697162	4.65938e-05	-0.00611273	0.995123	1
CA3so	486	39000	42018.7	4231.72	57390.3	3833.28	22.5173	2.81e-112	9.21e-112		1.36583		0.003992	0.00028065	0.0039302	0.00025892	0.00612424	0.995114	1
CA3sp	495	39100	34204	2942.54	47814.5	3230.48	27.0431	4.61e-161	2.26e-160		1.39792		0.00325109	0.000189346	0.00327426	0.000215082	-0.00253334	0.997979	1
CA3sr	504	39200	30750.6	2845.22	44411.9	3258.05	27.6441	3.29e-168	1.72e-167		1.44426		0.00292258	0.000191117	0.00304261	0.000235231	-0.01376	0.989021	1
DG	726	39300	123906	8002.6	195368	14742.1	41.6776	0	0		1.57674		0.0117836	0.000468191	0.0133663	0.000807584	0	1	1
DG-mo	10703	39400	74907.6	4956.73	118056	9246.02	40.4331	0	0		1.57602		0.00712261	0.000269678	0.00807462	0.000476855	-0.068745	0.945193	1
DG-po	10704	39500	20431.7	1323.37	31656.2	2349.73	40.2326	0	0		1.54937		0.0019444	0.000107965	0.00216853	0.000168775	-0.0310796	0.975206	1
DG-sg	632	39600	28566.6	1886.24	45655.4	3650.3	41.3859	0	0		1.59821		0.00271661	0.000110841	0.00312313	0.000198945	-0.0473951	0.962198	1
FC	982	41000	3389.41	508.407	5359.3	669.73	190.388	0	0		1.58119		0.000321209	4.13558e-05	0.000366097	3.67057e-05	-0.0152468	0.987835	1
IG	19	41100	2009.85	414.082	3802.84	448.185	14.4458	2.67e-47	5.21e-47		1.8921		0.000190247	3.55694e-05	0.000259829	2.41101e-05	-0.0294842	0.976478	1
RHP	822	41200	384086	25720	542714	39324.3	31.3305	1.79e-215	1.26e-214		1.413		0.0366035	0.0029051	0.0371532	0.00245394	-0.0178913	0.985726	1
ENT	909	41300	215989	16432.5	298367	25636.6	25.3113	2.4e-141	9.98e-141		1.3814		0.0205927	0.00188864	0.0204245	0.00163089	0.00733121	0.994151	1
ENTl	918	41350	156460	12674	215664	18761.2	24.1391	9.72e-129	3.59e-128		1.37839		0.0149175	0.00142726	0.0147627	0.00119396	0.00792928	0.993673	1
ENTl1	1121	41400	30084.7	2495.34	40792.9	3860.06	21.8703	4.98e-106	1.55e-105		1.35593		0.00286969	0.000290391	0.00279163	0.000239442	0.00914263	0.992705	1
ENTl2	20	41500	1104.01	118.598	1525.41	149.459	19.5747	2.54e-85	6.8e-85		1.3817		0.000105336	1.31028e-05	0.000104438	9.92887e-06	0.000547157	0.999563	1
ENTl2/3	999	41600	3467.19	326.427	4718.34	416.563	20.9674	1.3e-97	3.78e-97		1.36086		0.000330615	3.57876e-05	0.000323309	3.0713e-05	0.00251894	0.99799	1
ENTl2a	715	41700	15572.3	1288.17	21476.8	2082.71	22.8935	5.39e-116	1.83e-115		1.37917		0.00148526	0.000148937	0.00146982	0.000130788	0.00250612	0.998	1
ENTl2b	764	41800	17305.1	1483.73	23439.8	2270.56	21.2062	8.37e-100	2.46e-99		1.35451		0.0016504	0.000168428	0.00160425	0.000143583	0.00712921	0.994312	1
ENTl3	52	41900	23419.3	1972.15	32093.8	2897.12	22.7996	4.62e-115	1.55e-114		1.3704		0.00223313	0.00022161	0.00219675	0.000184006	0.00482178	0.996153	1
ENTl4	92	42000	9954.37	856.464	13864	1274.41	23.5333	1.86e-122	6.65e-122		1.39276		0.000949084	9.47097e-05	0.00094901	8.17976e-05	1.48675e-05	0.999988	1
ENTl4/5	312	42100	4518.69	441.543	6190.2	574.721	20.5957	3e-94	8.54e-94		1.36991		0.000430626	4.59763e-05	0.000424443	4.51534e-05	0.00186509	0.998512	1
ENTl5	139	42200	23488.1	1985.92	32799.9	2919.44	24.2673	4.34e-130	1.62e-129		1.39645		0.00223877	0.000215159	0.00224522	0.000186236	-0.000851153	0.999321	1
ENTl6a	28	42400	24677	2094.23	34399.3	3094.12	23.9447	1.05e-126	3.81e-126		1.39398		0.00235124	0.000218134	0.00235492	0.000200297	-0.000472959	0.999623	1
ENTl6b	60	42500	2869.84	258.265	4363.41	356.939	30.4121	3.8e-203	2.5e-202		1.52044		0.000273355	2.59765e-05	0.000298907	2.50779e-05	-0.00948743	0.99243	1
ENTm	926	42700	54141.2	4560.02	74502.6	7163.38	22.417	2.69e-111	8.73e-111		1.37608		0.00516162	0.000510492	0.00509951	0.000454037	0.00540985	0.995684	1
ENTm1	526	42800	14451	1230.7	20031.6	1954.98	22.7255	2.51e-114	8.36e-114		1.38618		0.00137796	0.000139821	0.0013712	0.000125377	0.00113845	0.999092	1
ENTm2	543	42900	14199.1	1227.48	19368.2	1790.76	21.8204	1.49e-105	4.59e-105		1.36405		0.00135391	0.00013839	0.00132576	0.000113877	0.00479427	0.996175	1
ENTm2a	468	43000	301.537	29.1119	556.672	74.1491	34.4603	3.16e-260	2.59e-259		1.84612		2.8748e-05	3.14519e-06	3.81536e-05	5.23651e-06	-0.0103235	0.991763	1
ENTm2b	508	43100	237.019	23.5959	477.066	64.306	38.3626	0	0		2.01278		2.25903e-05	2.47641e-06	3.26929e-05	4.51233e-06	-0.0122445	0.990231	1
ENTm3	664	43200	12139.5	1076.34	16615.2	1776.14	20.3481	4.82e-92	1.34e-91		1.36869		0.00115723	0.000118106	0.00113693	0.000111221	0.00373769	0.997018	1
ENTm4	712	43300	1646	158.315	2184.41	234.739	17.5304	8.4e-69	1.97e-68		1.3271		0.000156881	1.68206e-05	0.000149501	1.49956e-05	0	1	1
ENTm5	727	43400	3820.35	343.12	5069.44	530.425	18.5188	1.46e-76	3.66e-76		1.32696		0.000364184	3.7437e-05	0.000347028	3.43771e-05	0.00566086	0.995483	1
ENTm6	743	43600	7346.67	685.31	10199.9	1100.27	20.8086	3.62e-96	1.04e-95		1.38837		0.000700112	7.1895e-05	0.000698237	7.13246e-05	0.000442678	0.999647	1
ENTmv	934	43700	5387.36	481.861	8201.11	1086.6	24.7088	8.6e-135	3.43e-134		1.52229		0.000513615	5.28384e-05	0.000562302	7.89466e-05	-0.0131848	0.98948	1
ENTmv1	259	43800	2581.86	231.776	3772.3	507.839	22.0682	6.39e-108	2.01e-107		1.46108		0.000246185	2.57273e-05	0.000258668	3.70339e-05	-0.00492185	0.996073	1
ENTmv2	324	43900	2134.58	192.333	3383.25	445.283	27.0485	3.98e-161	1.96e-160		1.58497		0.000203472	2.0752e-05	0.000231924	3.2041e-05	0	1	1
ENTmv3	371	44000	653.185	60.1817	1018.2	141.51	25.1634	1.01e-139	4.15e-139		1.55882		6.22669e-05	6.49997e-06	6.98323e-05	1.03661e-05	-0.00585565	0.995328	1
ENTmv5/6	1133	44200	17.7315	3.01277	27.377	4.95703	12.973	1.74e-38	3.17e-38		1.54398		1.69057e-06	3.03508e-07	1.87807e-06	3.53336e-07	-0.000882476	0.999296	1
PAR	843	44300	20482.5	1926	27332.3	2507.09	19.3316	2.91e-83	7.69e-83		1.33442		0.00195338	0.000213756	0.00187142	0.000165691	0.0116664	0.990692	1
PAR2	10694	44500	15197.2	1546.74	20147.1	1822.29	18.0411	9.26e-73	2.26e-72		1.32571		0.0014495	0.000169372	0.00137964	0.000122782	0.0115558	0.99078	1
PAR3	10695	44600	5285.33	489.626	7185.2	744.65	19.7956	3.25e-87	8.79e-87		1.35946		0.000503881	5.32295e-05	0.000491775	4.73613e-05	0.00338169	0.997302	1
POST	1037	44700	16847.8	1500.69	22901.8	3006.96	18.3457	3.58e-75	8.88e-75		1.35933		0.0016054	0.000154904	0.00156756	0.000200195	0.00592095	0.995276	1
POST1	10696	44800	5045.21	438.694	6912.07	824.767	20.0944	8.26e-90	2.27e-89		1.37002		0.000480757	4.58579e-05	0.000473029	5.39022e-05	0.00220675	0.998239	1
POST2	10697	44900	103.157	13.9124	208.934	26.0965	34.7705	6.79e-265	5.81e-264		2.02539		9.84284e-06	1.43704e-06	1.42977e-05	1.72051e-06	-0.00817198	0.99348	1
POST3	10698	45000	11699.4	1066.82	15780.8	2186.24	17.1551	5.75e-66	1.31e-65		1.34885		0.0011148	0.000109194	0.00108024	0.000146522	0.00649947	0.994814	1
PRE	1084	45100	21936.8	1846.19	31302.6	2786.43	25.9177	4.21e-148	1.84e-147		1.42694		0.0020913	0.000202651	0.00214357	0.000185794	-0.00710377	0.994332	1
PRE2	10700	45300	15016.8	1300.64	21678.9	1875.86	26.5937	8.03e-156	3.71e-155		1.44365		0.00143161	0.000142229	0.00148467	0.000126529	-0.0086969	0.993061	1
PRE3	10701	45400	6920.08	602.477	9623.64	973.249	22.3876	5.2e-111	1.68e-110		1.39068		0.000659689	6.50916e-05	0.000658897	6.38922e-05	0.00019251	0.999846	1
SUB	502	45500	108830	7467.77	162810	12085.1	35.7244	1.65e-279	1.49e-278		1.49601		0.0103607	0.000690544	0.0111462	0.000765421	-0.0475262	0.962094	1
SUBd	509	45600	30884.2	2231.17	45435.5	4433.49	29.3896	7.45e-190	4.54e-189		1.47116		0.00293714	0.000152213	0.00310517	0.000228961	0	1	1
SUBd-m	829	45700	4741.34	339.629	7632.62	775.475	35.6198	6.92e-278	6.15e-277		1.6098		0.000450874	2.22616e-05	0.0005217	4.20542e-05	-0.0202413	0.983851	1
SUBd-sp	845	45800	20565.7	1483.4	29273.7	2861.09	26.8889	2.96e-159	1.41e-158		1.42342		0.0019561	0.000106312	0.0020008	0.000150164	-0.00628388	0.994986	1
SUBd-sr	837	45900	5577.09	429.296	8529.18	883.273	30.4879	3.77e-204	2.51e-203		1.52932		0.000530168	2.62844e-05	0.000582677	4.46398e-05	-0.0139853	0.988842	1
SUBv	518	46000	77943.1	5830.99	117372	10337.9	32.0922	5.66e-226	4.14e-225		1.50587		0.0074233	0.000586528	0.00804086	0.00072627	-0.0440831	0.964838	1
SUBv-m	853	46100	14110.6	1045.98	21865	2239.49	31.9725	2.63e-224	1.89e-223		1.54955		0.00134407	0.000108027	0.00149851	0.000162239	-0.0257595	0.979449	1
SUBv-sp	870	46200	54157.8	4240.89	80278.5	6809	30.5843	1.98e-205	1.32e-204		1.48231		0.00515787	0.000422471	0.00549868	0.000468107	-0.0292766	0.976644	1
SUBv-sr	861	46300	9674.73	711.272	15229	1571.91	33.2283	4.2e-242	3.29e-241		1.5741		0.000921361	7.08562e-05	0.00104367	0.000113108	-0.02456	0.980406	1
CTXsp	703	46400	160009	10031.1	204751	15877.2	22.5914	5.27e-113	1.74e-112		1.27962		0.0152338	0.000930302	0.0140291	0.00115622	0.0618105	0.950714	1
CLA	583	46600	20374.3	1663.93	28511.7	2274.78	26.1859	3.85e-151	1.71e-150		1.39939		0.00194081	0.000165822	0.00195245	0.000154081	-0.00164745	0.998686	1
EP	942	46700	56570.3	3649.7	76984.1	6087.3	27.5054	1.51e-166	7.85e-166		1.36086		0.00538802	0.000371386	0.00527322	0.000424655	0.00980312	0.992178	1
EPd	952	46800	43819.9	2971.12	60425.6	4692.07	28.1801	1.03e-174	5.57e-174		1.37895		0.00417327	0.000294189	0.0041383	0.000321023	0.00338475	0.997299	1
EPv	966	46900	12750.4	830.064	16558.5	1769.11	19.6373	7.43e-86	2e-85		1.29867		0.00121476	9.04289e-05	0.00113492	0.000126798	0	1	1
LA	131	47000	12622.8	1538.26	17366.5	2003.66	16.91	3.8e-64	8.58e-64		1.37581		0.00120044	0.000131717	0.00119171	0.00015765	0.00157419	0.998744	1
BLA	295	47100	35146.8	3414.3	42287.9	4357.7	11.7297	8.98e-32	1.56e-31		1.20318		0.00334445	0.000299394	0.00289871	0.000320264	0.0492824	0.960694	1
BLAa	303	47200	19285.5	1787.5	23433	2485.84	12.5206	5.76e-36	1.03e-35		1.21505		0.00183583	0.00016419	0.00160681	0.000187124	0.0341259	0.972777	1
BLAp	311	47300	10149.7	1201.98	12287	1265.81	10.7343	7.02e-27	1.17e-26		1.21058		0.000965051	0.000100039	0.000841928	9.03999e-05	0.025316	0.979803	1
BLAv	451	47400	5711.52	576.837	6567.9	846.016	7.9324	2.15e-15	3.35e-15		1.14994		0.000543566	5.19777e-05	0.000449969	5.81902e-05	0.0258437	0.979382	1
BMA	319	47500	28125.6	2144.11	30436.6	3030.26	5.8435	5.11e-09	7.61e-09		1.08217		0.00267757	0.000196872	0.00208519	0.000210845	0.0743203	0.940756	1
BMAa	327	47600	8089.16	681.081	8387.79	862.162	2.49836	0.0124771	0.0177251		1.03692		0.000770526	6.78364e-05	0.00057475	6.0821e-05	0.0460396	0.963279	1
BMAp	334	47700	20036.5	1677.23	22048.8	2283.62	6.63341	3.28e-11	4.98e-11		1.10043		0.00190705	0.000149359	0.00151044	0.000157842	0.0588269	0.95309	1
PA	780	47800	7169.01	539.851	9163.93	940.784	18.0159	1.46e-72	3.55e-72		1.27827		0.000682502	4.94429e-05	0.000627857	6.68085e-05	0	1	1
CNU	623	47900	1.12009e+06	73052.4	1.45609e+06	120289	23.1755	8.05e-119	2.81e-118		1.29998		0.106487	0.0032014	0.0995142	0.0049334	0.134982	0.892626	1
STR	477	48000	906516	56134.7	1.15543e+06	90038.3	22.5888	5.59e-113	1.84e-112		1.27458		0.086211	0.00301118	0.0789923	0.00385999	0.155826	0.87617	1
STRd	485	48100	520353	36326.4	610034	44771.7	14.0925	4.22e-45	8.1e-45		1.17235		0.0495329	0.00328393	0.0417652	0.00286914	0.22408	0.822695	1
CP	672	48200	520353	36326.4	610034	44771.7	14.0925	4.22e-45	8.1e-45		1.17235		0.0495329	0.00328393	0.0417652	0.00286914	0.22408	0.822695	1
STRv	493	48300	184321	11769.2	253052	31202.1	22.4253	2.23e-111	7.27e-111		1.37289		0.017536	0.000818288	0.0172736	0.00157391	0.0124011	0.990106	1
ACB	56	48400	98499.9	6814.06	138354	19563.7	21.3041	1.04e-100	3.09e-100		1.40461		0.00937258	0.000537225	0.0094384	0.00102568	-0.00423944	0.996617	1
FS	998	48500	9161.17	825.473	10132.1	981.265	6.88641	5.72e-12	8.76e-12		1.10598		0.000872236	7.75105e-05	0.000693436	6.11227e-05	0.0391943	0.968735	1
OT	754	48600	76659.8	5240.14	104566	12076.8	22.3774	6.53e-111	2.1e-110		1.36403		0.00729114	0.00033428	0.00714181	0.00062339	0	1	1
isl	481	48700	5750.48	778.462	8758.38	1183.98	18.8677	2.1e-79	5.41e-79		1.52307		0.00054592	6.07313e-05	0.000597496	6.1997e-05	0	1	1
islm	489	48800	961.62	253.907	1848.93	554.269	13.7548	4.77e-43	8.91e-43		1.92273		9.09479e-05	2.18749e-05	0.000125479	3.43223e-05	-0.02111	0.983158	1
OT1	458	49000	26243	1804.75	35983.9	4065.98	23.025	2.62e-117	9.03e-117		1.37118		0.00249611	0.000118908	0.00245812	0.000211034	0.00475979	0.996202	1
OT2	465	49100	24506.9	1644.83	33697.7	4129.2	22.2857	5.08e-110	1.62e-109		1.37503		0.00233112	0.000108802	0.0023013	0.000218884	0.00386479	0.996916	1
OT3	473	49200	19196.9	1287.96	24275.3	2466.28	18.41	1.09e-75	2.73e-75		1.26454		0.00182696	0.000104667	0.00165929	0.000129525	0.0248984	0.980136	1
LSX	275	49300	108332	24515.2	191139	32503.1	16.0563	5.17e-58	1.1e-57		1.76437		0.0102463	0.00203855	0.0130207	0.00173945	-0.162942	0.870564	1
LS	242	49400	92226.9	20862.7	162724	28393.3	16.0248	8.57e-58	1.82e-57		1.76439		0.00872322	0.00173336	0.0110834	0.00153586	-0.150234	0.88058	1
LSc	250	49500	28942.4	6372.56	50473.9	8569.15	16.7016	1.28e-62	2.84e-62		1.74394		0.00273846	0.00052454	0.00343952	0.000465162	-0.0798557	0.936352	1
LSr	258	49600	60670.3	14282.3	107565	19487.7	15.1276	1.06e-51	2.15e-51		1.77295		0.00573752	0.00120285	0.00732567	0.00107547	-0.12451	0.900911	1
LSv	266	49700	2614.23	605.169	4684.98	1202.27	15.0118	6.14e-51	1.22e-50		1.79211		0.000247245	4.95064e-05	0.00031821	7.09555e-05	-0.0267518	0.978658	1
SF	310	49800	13047.8	2986.85	22841.8	3646.38	15.9603	2.42e-57	5.12e-57		1.75063		0.00123394	0.000248881	0.00155706	0.00019112	-0.054772	0.95632	1
SH	333	49900	3057.62	844.316	5572.77	868.75	245.643	0	0		1.82258		0.000289146	7.51546e-05	0.000380266	4.79553e-05	-0.0316038	0.974788	1
sAMY	278	50000	93510	6950.76	101206	8767.42	6.36253	1.98e-10	3e-10		1.0823		0.00889589	0.000531503	0.00693266	0.000606091	0.135117	0.892519	1
AAA	23	50100	14703.9	1211.64	16168.5	1627.01	6.71051	1.94e-11	2.96e-11		1.0996		0.00139984	0.000112575	0.00110727	0.000107566	0.0506598	0.959597	1
BA	292	50200	1080.64	110.664	1216.03	119.415	7.46556	8.29e-14	1.28e-13		1.12529		0.000102699	8.01604e-06	8.33159e-05	8.36996e-06	0.0123484	0.990148	1
CEA	536	50300	30227.8	2384.79	31612.4	2991.48	3.3429	0.000829083	0.00119768		1.0458		0.00287643	0.000200551	0.00216603	0.000211955	0.0863633	0.931178	1
CEAc	544	50400	12091	881.92	12643.9	1223.14	3.43622	0.00058989	0.000856269		1.04573		0.00115108	8.08813e-05	0.000866316	8.62452e-05	0.0547288	0.956355	1
CEAl	551	50500	4578.19	544.479	5090.03	541.098	5.88798	3.91e-09	5.84e-09		1.1118		0.000435334	4.56896e-05	0.000349044	4.08727e-05	0	1	1
CEAm	559	50600	13558.7	1109.19	13878.5	1310.95	1.71152	0.0869846	0.122268		1.02359		0.00129002	9.08237e-05	0.000950671	9.00416e-05	0.0617671	0.950748	1
IA	1105	50700	5494.89	387.558	6007.26	603.887	6.81924	9.15e-12	1.4e-11		1.09325		0.00052331	3.8193e-05	0.000411644	4.27637e-05	0.0316472	0.974753	1
MEA	403	50800	33988.3	3050.17	37127.9	3348.32	6.28714	3.23e-10	4.88e-10		1.09237		0.00323135	0.000218133	0.00254267	0.000227327	0.0785416	0.937397	1
MEAad	411	50900	15081.6	1358.19	16032.8	1436.18	4.34599	1.39e-05	2.02e-05		1.06307		0.00143382	9.75697e-05	0.00109796	9.65492e-05	0.0577081	0.953981	1
MEAav	418	51000	8398.59	808.557	9590.38	1029.09	8.47798	2.29e-17	3.61e-17		1.1419		0.000798422	5.91889e-05	0.000656655	6.90439e-05	0.0323286	0.97421	1
MEApd	426	51100	8612.54	832.153	9233.75	872.28	4.63022	3.65e-06	5.35e-06		1.07213		0.000818892	6.34794e-05	0.000632525	6.13861e-05	0.0423249	0.96624	1
MEApd-a	472	51200	3571.54	332.188	3819.85	362.741	4.56613	4.97e-06	7.27e-06		1.06953		0.000339613	2.52128e-05	0.000261625	2.50588e-05	0.0275123	0.978051	1
MEApd-b	480	51300	2508.52	254.307	2610.3	250.234	2.54172	0.0110307	0.0157263		1.04057		0.000238511	1.99186e-05	0.000178805	1.75663e-05	0.0252212	0.979879	1
MEApd-c	487	51400	2532.48	275.534	2803.61	273.701	6.20004	5.64e-10	8.5e-10		1.10706		0.000240767	2.18325e-05	0.000192095	1.97151e-05	0.0202976	0.983806	1
MEApv	435	51500	1895.55	192.321	2270.9	238.868	11.3671	6.1e-30	1.04e-29		1.19802		0.000180213	1.45268e-05	0.00015553	1.64258e-05	0.0117643	0.990614	1
PAL	803	51600	213573	20846.4	300661	33374.5	21.1861	1.28e-99	3.76e-99		1.40777		0.0202756	0.00112978	0.020522	0.00150125	-0.0107819	0.991397	1
PALd	818	51700	48610.6	4052.8	48386.8	4220.28	-0.344955	0.730128	1		0.995397		0.00462294	0.000303323	0.00331213	0.000266945	0.126459	0.899369	1
GPe	1022	51800	41171.7	3447.98	41072.7	3657.1	-0.177944	0.858767	1		0.997596		0.00391585	0.000264988	0.00281129	0.000229915	0.115756	0.907846	1
GPi	1031	51900	7438.87	700.96	7314.08	619.742	-1.19111	0.23361	0.326074		0.983225		0.000707087	4.98368e-05	0.000500847	4.12032e-05	0.050942	0.959372	1
PALv	835	52000	72594	5093.78	96793.9	8833.6	23.3894	5.48e-121	1.94e-120		1.33336		0.00690577	0.000370624	0.00661544	0.000413564	0.0219787	0.982465	1
SI	342	52100	65690.7	4595.55	87793.2	8148.6	23.4162	2.92e-121	1.04e-120		1.33646		0.00624873	0.000326267	0.00599964	0.000379272	0	1	1
MA	298	52200	6903.3	549.879	9000.66	820.646	20.0457	2.2e-89	6.01e-89		1.30382		0.000657039	4.85157e-05	0.000615802	4.71853e-05	0.0101585	0.991895	1
PALm	826	52300	60098	15657.1	97933.7	14666.6	11.2605	2.06e-29	3.5e-29		1.62957		0.00568301	0.00135658	0.00667826	0.00077212	-0.0798536	0.936354	1
MSC	904	52400	49968	13283.1	81946.9	12978.5	11.0137	3.28e-28	5.52e-28		1.63999		0.00472574	0.00115631	0.0055865	0.00069992	-0.075639	0.939706	1
MS	564	52500	22395.4	6840.77	34448.4	5656.26	456.536	0	0		1.53819		0.00211583	0.000607559	0.00235121	0.000315376	-0.0313117	0.975021	1
NDB	596	52600	27572.6	6568.29	47498.5	8409.01	13.8382	1.5e-43	2.82e-43		1.72267		0.00260991	0.000561953	0.00323529	0.000470875	-0.0731841	0.94166	1
TRS	581	52700	10130	2593.19	15986.8	2141.02	9.85706	6.39e-23	1.03e-22		1.57816		0.000957268	0.000223178	0.00109176	0.000113973	-0.026458	0.978892	1
PALc	809	52800	32270	3737.87	57546.9	11546.4	24.4263	8.99e-132	3.44e-131		1.78329		0.00306384	0.000253519	0.00391616	0.000645075	-0.091419	0.92716	1
BST	351	52900	31857.2	3673.28	56779.1	11338.8	24.5304	7e-133	2.71e-132		1.7823		0.0030248	0.000250248	0.0038641	0.000633016	-0.0906129	0.9278	1
BSTa	359	53000	17057.1	1993.68	29164.5	5900.6	22.4855	5.75e-112	1.88e-111		1.70982		0.00161958	0.000138021	0.00198494	0.000332186	-0.0544135	0.956606	1
BSTal	537	53100	4761.74	580.63	6659.21	633.731	19.0722	4.3e-81	1.12e-80		1.39848		0.000452604	4.75782e-05	0.000455362	3.41792e-05	-0.000808367	0.999355	1
BSTam	498	53200	5665.29	683.451	10282	3165.32	18.5356	1.07e-76	2.68e-76		1.81491		0.000537952	4.90617e-05	0.000697792	0.00019196	-0.0407757	0.967475	1
BSTdm	505	53300	1202.28	299.06	2099.9	533.034	13.3783	8.1e-41	1.5e-40		1.7466		0.000113676	2.50492e-05	0.000142629	3.14082e-05	-0.0161903	0.987083	1
BSTfu	513	53400	366.528	43.7267	570.508	147.518	16.4695	6.08e-61	1.33e-60		1.55652		3.48287e-05	3.41797e-06	3.88346e-05	8.72245e-06	-0.00415065	0.996688	1
BSTju	546	53500	280.38	38.0798	381.279	35.0339	16.372	3.03e-60	6.55e-60		1.35987		2.66562e-05	3.29501e-06	2.60894e-05	2.10602e-06	0	1	1
BSTmg	521	53600	1399.7	240.532	3041.08	871.218	21.5624	4.05e-103	1.24e-102		2.17266		0.000132658	1.8476e-05	0.000206329	5.25916e-05	-0.036155	0.971159	1
BSTov	554	53700	1132.84	185.085	1631.08	146.283	16.8884	5.48e-64	1.23e-63		1.43981		0.000107629	1.58197e-05	0.000111648	9.20052e-06	-0.00240266	0.998083	1
BSTrh	562	53800	832.843	120.148	1219.43	107.942	19.605	1.4e-85	3.76e-85		1.46417		7.91286e-05	9.91906e-06	8.34463e-05	6.50372e-06	0	1	1
BSTv	529	53900	1415.46	156.913	3280.02	910.647	28.2716	7.72e-176	4.22e-175		2.31727		0.000134444	1.09021e-05	0.000222806	5.48788e-05	-0.0423252	0.966239	1
BSTp	367	54000	14800.2	1701.91	27614.6	5492.88	26.5469	2.79e-155	1.27e-154		1.86583		0.00140523	0.000115095	0.00187917	0.00030526	-0.0742693	0.940796	1
BSTd	569	54100	101.759	16.8788	151.311	47.2411	11.5147	1.11e-30	1.91e-30		1.48696		9.66165e-06	1.41034e-06	1.03006e-05	2.953e-06	-0.00126815	0.998988	1
BSTpr	578	54200	8146.62	1069.87	15395.8	3605.2	23.145	1.63e-118	5.67e-118		1.88984		0.00077298	7.43331e-05	0.00104631	0.000207094	-0.0575839	0.95408	1
BSTif	585	54300	5131	534.038	9761.87	1795.63	29.875	4.16e-196	2.64e-195		1.90253		0.000487557	3.82763e-05	0.000664798	9.86379e-05	-0.0469325	0.962567	1
BSTtr	594	54400	807.963	93.1531	1272.77	107.05	27.9374	9.37e-172	4.99e-171		1.57528		7.67824e-05	7.297e-06	8.71085e-05	6.47378e-06	0	1	1
BSTse	602	54500	612.843	98.4464	1032.82	92.7832	24.6657	2.5e-134	9.84e-134		1.68529		5.82468e-05	8.60687e-06	7.06457e-05	5.27499e-06	-0.00975966	0.992213	1
BAC	287	54600	412.769	101.912	767.77	230.252	14.0074	1.41e-44	2.68e-44		1.86005		3.90345e-05	8.56572e-06	5.20567e-05	1.38484e-05	-0.0122519	0.990225	1
CB	512	54700	1255663	72864.8	1.24137e+06	260715	-0.526391	0.598617	0.824043		0.988615		0.119523	0.0062275	0.0853774	0.0196285	0.648072	0.516938	1
CBX	528	54800	1.04782e+06	62956.5	1.03202e+06	194503	-0.768072	0.442445	0.611165		0.98492		0.099744	0.00552123	0.0709467	0.0148025	0.598605	0.549436	1
VERM	645	54900	463632	41800.9	442281	126996	-1.49167	0.135786	0.190641		0.953947		0.0440772	0.00327817	0.0304712	0.00941367	0.426821	0.66951	1
LING	912	55000	3367.65	592.158	4460.54	4067.46	110.871	0	0		1.32453		0.0003194	5.12559e-05	0.000311713	0.000284132	0.00269707	0.997848	1
LINGmo	10707	55100	1864.01	335.27	2442.49	2326.4	79.0821	0	0		1.31034		0.000176795	2.92008e-05	0.00017087	0.000162526	0.00279882	0.997767	1
LINGgr	10705	55300	1503.64	258.568	2018.39	1750.56	77.9032	0	0		1.34234		0.000142605	2.22267e-05	0.000140843	0.000122246	0.000923518	0.999263	1
CENT	920	55400	126341	12894.8	238066	48789.6	23.9045	2.75e-126	9.97e-126		1.88431		0.0120028	0.000963972	0.0163173	0.00340956	-0.230423	0.817763	1
CENT2	976	55500	47945.1	5656.13	106165	18296.1	32.709	1.16e-234	8.72e-234		2.2143		0.0045521	0.000429436	0.00724255	0.00107788	-0.22401	0.82275	1
CENT2mo	10710	55600	25145.3	2965.81	54985.4	9455.27	32.6137	2.62e-233	1.95e-232		2.18671		0.00238739	0.000225417	0.00375007	0.000548983	-0.157219	0.875073	1
CENT2gr	10708	55800	22799.8	2691.9	51179.4	8922.9	32.5263	4.53e-232	3.36e-231		2.24473		0.00216471	0.00020421	0.00349249	0.000535112	-0.159697	0.87312	1
CENT3	984	55900	78396.2	7536.49	131902	41255.5	13.9615	2.68e-44	5.08e-44		1.6825		0.0074507	0.000573887	0.00907474	0.00295211	-0.112923	0.910092	1
CENT3mo	10713	56000	38380.4	3674.57	65048	17313.8	16.4357	1.06e-60	2.32e-60		1.69483		0.00364775	0.000280663	0.0044714	0.00124964	-0.0817333	0.934859	1
CENT3gr	10711	56200	40015.9	3867.54	66853.5	24231.6	11.78	4.95e-32	8.61e-32		1.67068		0.00380295	0.000293902	0.00460334	0.00171988	-0.0780036	0.937825	1
CUL	928	56300	170439	13509	181491	63553.7	1.74929	0.0802406	0.112921		1.06484		0.0162147	0.00111472	0.0125421	0.00471152	0.187401	0.851346	1
CUL4, 5	1091	57200	170439	13509	181491	63553.7	1.74929	0.0802406	0.112921		1.06484		0.0162147	0.00111472	0.0125421	0.00471152	0.187401	0.851346	1
CUL4, 5mo	10722	57300	90548.7	7038.32	98314.1	31060.1	2.52153	0.0116845	0.0166386		1.08576		0.00861488	0.000584055	0.00678615	0.00230698	0.127714	0.898375	1
CUL4, 5gr	10720	57500	79890.6	6483.14	83176.7	32593.6	1.00837	0.313276	0.434742		1.04113		0.00759978	0.000532313	0.00575599	0.00241006	0.1378	0.890398	1
DEC	936	57600	71831.1	7712.23	8987.15	13924.3	-1486.97	0	0		0.125115		0.00683098	0.000664286	0.000643519	0.00101575	0.456056	0.64835	1
DECmo	10725	57700	36212.5	3870.06	4798.89	7631.04	-1054.37	0	0		0.13252		0.00344366	0.000332762	0.000344123	0.000557897	0.324674	0.745428	1
DECgr	10723	57900	35618.6	3903.37	4188.79	6307.96	-1047.53	0	0		0.117601		0.00338731	0.000337912	0.000299396	0.000458853	0.319966	0.748994	1
FOTU	944	58000	5186.26	1303.05	1.59016	0.667759	-66.8306	0	0		0.000306611		0.0004937	0.000122916	1.02239e-07	5.60383e-08	0.0211819	0.983101	1
FOTUmo	10728	58100	2460.48	638.577	1	0	-60.9763	0	0		0.000406425		0.000234372	6.04639e-05	0	0	0.000287477	0.999771	1
FOTUgr	10726	58300	2724.61	673.3	1	0	-61.7733	0	0		0.000367025		0.000259217	6.32899e-05	0	0	0.000289006	0.999769	1
PYR	951	58400	10848.8	2584.11	1	0	-68.4758	0	0		9.21763e-05		0.00103199	0.000242643	0	0	0.000309971	0.999753	1
PYRmo	10731	58500	4300.37	1451.25	1	0	-57.1211	0	0		0.000232538		0.00040949	0.000137102	0	0	0.000295944	0.999764	1
PYRgr	10729	58700	6548.41	1285.98	1	0	-66.0029	0	0		0.000152709		0.000622502	0.000119019	0	0	0.0003023	0.999759	1
UVU	957	58800	39921.2	7329.03	152.787	526.517	-22.9443	1.68e-116	5.76e-116		0.00382721		0.003795	0.000672151	1.10699e-05	3.78341e-05	0.15156	0.879534	1
UVUmo	10734	58900	19015.3	3471.58	69.7869	260.57	-24.4003	1.7e-131	6.49e-131		0.00367004		0.00180726	0.000316529	4.99396e-06	1.85969e-05	0.102745	0.918165	1
UVUgr	10732	59100	20905.9	3886.6	83.8852	270.2	-24.286	2.75e-130	1.03e-129		0.00401251		0.00198774	0.000358404	6.07595e-06	1.95783e-05	0.11138	0.911315	1
NOD	968	59200	35696.8	4702.85	9123.57	13413.8	-951.13	0	0		0.255585		0.00338871	0.000377676	0.000645384	0.000954537	0.312656	0.754542	1
NODmo	10737	59300	17539.9	2244.63	4679.21	6081.78	-658.073	0	0		0.266776		0.0016651	0.000177215	0.000329969	0.000430528	0.217778	0.827602	1
NODgr	10735	59500	18157	2483.04	4444.87	7477.33	-5.61966	1.91e-08	2.84e-08		0.244802		0.00172361	0.000203088	0.000315416	0.000533935	0.224263	0.822552	1
HEM	1073	59600	584192	36842.8	589742	80342.8	0.617407	0.536966	0.740026		1.0095		0.0556668	0.00406327	0.0404755	0.00612692	0.42161	0.67331	1
SIM	1007	59700	125056	8971.22	197042	22872	31.2884	6.72e-215	4.71e-214		1.57563		0.0119155	0.000958564	0.0134995	0.00160909	-0.0884445	0.929523	1
SIMmo	10674	59800	69512.9	4825.12	109051	12918.5	30.9687	1.42e-210	9.69e-210		1.56878		0.00662313	0.000517805	0.00747353	0.000926985	-0.0637417	0.949176	1
SIMgr	10672	60000	55542.8	4170.32	87991.2	10173.6	31.1686	2.84e-213	1.97e-212		1.5842		0.00529241	0.0004428	0.006026	0.000696143	-0.0613981	0.951042	1
AN	1017	60100	218567	14881.9	196351	47103.6	-4.34484	1.39e-05	2.03e-05		0.898357		0.0208258	0.00159406	0.0135133	0.00352039	0.335931	0.736923	1
ANcr1	1056	60200	86493.2	5896.02	112508	16893.8	15.6224	5.13e-55	1.06e-54		1.30077		0.00824144	0.000640023	0.00772602	0.00129828	0.0358485	0.971403	1
ANcr1mo	10677	60300	32093.9	2258.42	36550.1	4458.2	8.83357	1.01e-18	1.61e-18		1.13885		0.00305797	0.000243345	0.00250748	0.000339427	0.064172	0.948833	1
ANcr1gr	10675	60500	54399.3	3719.59	75957.9	14078.9	16.8527	1e-63	2.25e-63		1.3963		0.00518347	0.000403251	0.00521854	0.00105763	-0.00303833	0.997576	1
ANcr2	1064	60600	132073	10070.7	83842.8	33228.1	-11.213	3.52e-29	5.96e-29		0.63482		0.0125844	0.00104667	0.00578723	0.00240926	0.411216	0.680914	1
ANcr2mo	10680	60700	50565.2	4183.05	20966.8	12195.8	-14.1531	1.79e-45	3.45e-45		0.414647		0.00481792	0.00042727	0.00145292	0.000876595	0.329888	0.741485	1
ANcr2gr	10678	60900	81508.1	5960.57	62876	21319.3	-7.47694	7.61e-14	1.18e-13		0.771409		0.00776647	0.000626209	0.00433432	0.0015522	0.261507	0.793701	1
PRM	1025	61000	54693.5	5191.43	3615.1	4264.69	-1252.4	0	0		0.0660974		0.00520951	0.000505538	0.000254083	0.000309166	0.370973	0.710658	1
PRMmo	10683	61100	23093.4	2360.98	1300.61	1337.44	-797.643	0	0		0.0563195		0.00219964	0.000229536	9.07644e-05	9.5245e-05	0.234482	0.814611	1
PRMgr	10681	61300	31600.2	2872.44	2314.77	2979.75	-13.6662	1.62e-42	3.01e-42		0.0732519		0.00300987	0.00027994	0.000163319	0.000217353	0.28649	0.774503	1
COPY	1033	61400	46871.7	3582.18	3526.67	6086.95	-11.5006	1.31e-30	2.25e-30		0.075241		0.00446422	0.000350748	0.000251616	0.000445804	0.35076	0.725769	1
COPYmo	10686	61500	16758.7	1595.61	637.246	1271.97	-15.0853	2.02e-51	4.07e-51		0.0380249		0.00159599	0.000152979	4.58702e-05	9.37974e-05	0.186248	0.85225	1
COPYpu	10685	61600	1.91667	0.476063	1.34426	1.40101	-2.71862	0.00655555	0.00936842		0.701354		1.78185e-07	5.79558e-08	3.0549e-08	1.20509e-07	0.00229863	0.998166	1
COPYgr	10684	61700	30111.1	2112.15	2889.44	4832.97	-10.2908	7.76e-25	1.27e-24		0.0959593		0.00286805	0.000210209	0.000205715	0.000353195	0.28936	0.772306	1
PFL	1041	61800	93496.9	11195.8	124244	17776.3	13.8438	1.39e-43	2.61e-43		1.32886		0.00891351	0.0011526	0.00851312	0.00123712	0.0266927	0.978705	1
PFLmo	10689	61900	40628.9	4458.68	51692.6	8236.05	11.5642	6.26e-31	1.08e-30		1.27231		0.00387334	0.000464384	0.0035437	0.000584151	0.0335786	0.973213	1
PFLgr	10687	62100	52868.1	6775.92	72551.9	10049.7	15.0843	2.05e-51	4.13e-51		1.37232		0.00504017	0.00069208	0.00496943	0.000685143	0.00623702	0.995024	1
FL	1049	62200	45506.4	4552.92	64961.5	7993.16	20.5349	1.05e-93	2.96e-93		1.42752		0.00433811	0.000480049	0.00444377	0.000496902	-0.00997206	0.992044	1
FLmo	10692	62300	15124.8	1500.88	20957.2	2543.54	19.0281	9.98e-81	2.58e-80		1.38562		0.00144184	0.000158736	0.00143345	0.000156792	0.0013814	0.998898	1
FLgr	10690	62500	30381.6	3286.53	44004.3	5638.87	20.1163	5.31e-90	1.46e-89		1.44838		0.00289627	0.000341477	0.00301032	0.000353777	-0.013138	0.989518	1
CBN	519	62900	31398.8	1836.37	31462.3	16429.2	0.0333987	0.973357	1		1.00202		0.00298829	0.000145079	0.00217781	0.00116811	0.0970563	0.922682	1
FN	989	63000	9865.66	725.367	6669.1	5926.3	-212.441	0	0		0.675991		0.000938551	5.49144e-05	0.000466431	0.000419362	0.104221	0.916994	1
IP	91	63100	13647.8	849.043	14508.4	7915.72	0.803743	0.421545	0.582968		1.06306		0.00129889	6.85771e-05	0.00100401	0.000559505	0.0531695	0.957597	1
DN	846	63200	7885.38	595.413	10284.9	3169.11	7.85618	3.96e-15	6.15e-15		1.3043		0.000750842	5.62309e-05	0.00070737	0.000224999	0.010009	0.992014	1
BS	343	63300	3.05097e+06	316103	4.52735e+06	481249	23.6689	7.55e-124	2.72e-123		1.48391		0.289594	0.0188202	0.30894	0.0192663	-0.221767	0.824496	1
IB	1129	63400	878990	121345	1.41012e+06	171775	22.0175	1.96e-107	6.11e-107		1.60425		0.0833445	0.00860252	0.096165	0.00755559	-0.269648	0.787431	1
TH	549	63500	469093	53206.9	697318	68713.7	23.2155	3.17e-119	1.11e-118		1.48652		0.0445068	0.00324957	0.0475972	0.00248503	-0.0903179	0.928035	1
DORsm	864	63600	120363	9452.28	165922	14943.9	24.9706	1.27e-137	5.15e-137		1.37851		0.0114393	0.000500633	0.0113342	0.000587183	0.00614606	0.995096	1
VENT	637	63700	80688.9	6430.83	110259	12183.2	21.9104	2.07e-106	6.44e-106		1.36648		0.00766965	0.000371458	0.00752496	0.000520502	0	1	1
VAL	629	63800	19713.8	1516.24	27385.5	3106.8	23.0524	1.39e-117	4.82e-117		1.38915		0.00187492	0.000107199	0.00187002	0.000150852	0.000706447	0.999436	1
VM	685	63900	12832.8	1254.51	23899.2	6277.29	22.897	4.98e-116	1.7e-115		1.86236		0.00121888	7.7165e-05	0.00162062	0.000351074	-0.0676901	0.946032	1
VP	709	64000	48142.3	4128.21	58974.8	4802.43	15.552	1.54e-54	3.19e-54		1.22501		0.00457585	0.000259061	0.00403431	0.000264643	0.0510525	0.959284	1
VPL	718	64100	19390.1	1790.64	22374	1773.74	10.5303	6.27e-26	1.04e-25		1.15389		0.00184289	0.000119885	0.00153212	0.000119231	0.0465752	0.962852	1
VPLpc	725	64200	1425.54	124.705	1810.92	168.713	17.1788	3.82e-66	8.75e-66		1.27034		0.000135547	8.95221e-06	0.000123819	8.90184e-06	0.00638756	0.994903	1
VPM	733	64300	27326.7	2269.11	34789.9	3053.7	18.3387	4.06e-75	1.01e-74		1.27311		0.00259741	0.000137502	0.00237838	0.000152054	0.0272418	0.978267	1
VPMpc	741	64400	3325.31	386.501	5659.1	1319.3	20.5004	2.14e-93	6e-93		1.70182		0.000315618	2.55816e-05	0.000384072	7.07599e-05	-0.0231307	0.981546	1
SPF	406	64500	7608.07	796.695	10760.8	1055.69	21.3916	1.6e-101	4.81e-101		1.41439		0.000722132	4.77884e-05	0.000735208	4.95794e-05	-0.00302799	0.997584	1
SPFm	414	64600	2462.5	661.888	3866.7	552.991	9.90142	4.1e-23	6.63e-23		1.57024		0.000232653	5.76604e-05	0.000263846	3.08827e-05	-0.0124623	0.990057	1
SPFp	422	64700	5145.57	395.426	6894.07	673.355	22.1583	8.67e-109	2.73e-108		1.3398		0.00048948	2.99169e-05	0.000471361	3.55301e-05	0.00514734	0.995893	1
SPA	609	64800	2142.01	412.899	3148.7	308.019	124.788	0	0		1.46998		0.000202719	3.45779e-05	0.000215339	1.76915e-05	-0.0054722	0.995634	1
PP	1044	64900	1914.92	152.018	2436.85	193.714	19.1802	5.42e-82	1.41e-81		1.27256		0.00018225	1.33441e-05	0.00016702	1.46988e-05	0.00714994	0.994295	1
GENd	1008	65000	28009.5	2434.91	39316.6	2821.27	26.5283	4.57e-155	2.08e-154		1.40369		0.00266254	0.000164364	0.00269165	0.00017841	-0.00351577	0.997195	1
MG	475	65100	14525.1	1192.7	21526.2	1753.44	30.4311	2.13e-203	1.41e-202		1.482		0.00138145	8.94372e-05	0.00147449	0.000123058	-0.0154414	0.98768	1
MGd	1072	65200	3938.85	343.632	6422.02	606.115	34.6668	2.5e-263	2.08e-262		1.63043		0.000374501	2.45763e-05	0.00043977	4.08263e-05	-0.0204031	0.983722	1
MGv	1079	65300	7577.06	629.505	10942.7	884.356	28.2029	5.38e-175	2.93e-174		1.44419		0.000720657	4.82757e-05	0.000749726	6.44332e-05	-0.00671155	0.994645	1
MGm	1088	65400	3009.19	245.404	4161.48	348.349	25.1093	3.93e-139	1.6e-138		1.38292		0.000286286	1.96614e-05	0.000284998	2.35834e-05	0.000475471	0.999621	1
LGd	170	65500	13484.4	1386.98	17790.4	1451.68	18.7016	4.81e-78	1.22e-77		1.31933		0.0012811	9.44373e-05	0.00121716	8.28751e-05	0.0112535	0.991021	1
DORpm	856	65600	292192	39251.5	443284	44558.6	21.0329	3.28e-98	9.55e-98		1.5171		0.0277039	0.00270113	0.0302548	0.00164623	-0.0941024	0.925028	1
LAT	138	65700	46054	3042.74	64126.6	5946.64	27.2801	7.3e-164	3.73e-163		1.39242		0.00438141	0.000220349	0.00438475	0.000322629	-0.000314867	0.999749	1
LP	218	65800	20364.6	1361.57	29572.1	3092.24	28.6375	2.3e-180	1.29e-179		1.45213		0.00193767	0.000105563	0.0020211	0.000167618	-0.0117415	0.990632	1
PO	1020	65900	21167.8	1450.84	27851.8	2758.07	21.4675	3.13e-102	9.48e-102		1.31576		0.00201365	0.000103338	0.00190474	0.000158656	0.0153024	0.987791	1
POL	1029	66000	2727.39	237.902	3984.16	381.597	27.0659	2.48e-161	1.24e-160		1.4608		0.000259455	1.89884e-05	0.000272753	2.46249e-05	-0.00510704	0.995925	1
SGN	325	66100	1794.16	159.574	2718.54	249.224	29.5886	2.1e-192	1.3e-191		1.51522		0.000170628	1.21587e-05	0.000186157	1.66901e-05	-0.00730112	0.994175	1
ATN	239	66200	40553.7	3997.12	65403.7	7497.16	29.3283	4.52e-189	2.72e-188		1.61277		0.00385289	0.000265034	0.00446182	0.00031328	-0.0595211	0.952537	1
AV	255	66300	6806.27	828.699	11364.8	1066.17	29.5427	8.14e-192	5e-191		1.66976		0.000647206	6.98653e-05	0.000777183	5.85897e-05	-0.0307593	0.975462	1
AM	127	66400	9196.27	1306.03	17834.1	3968.15	24.2033	2.05e-129	7.62e-129		1.93928		0.000872408	9.56466e-05	0.00121153	0.000216614	-0.0668292	0.946718	1
AMd	1096	66500	7318.89	1059.03	14013	3000.99	24.0253	1.51e-127	5.54e-127		1.91464		0.000694226	7.78304e-05	0.000952263	0.000162304	-0.0571771	0.954404	1
AMv	1104	66600	1877.38	251.067	3821.1	982.953	24.2884	2.6e-130	9.78e-130		2.03534		0.000178183	1.83765e-05	0.000259265	5.55783e-05	-0.0349433	0.972125	1
AD	64	66700	3657.88	394.156	6535.3	854.962	31.9819	1.95e-224	1.41e-223		1.78663		0.000347897	3.32631e-05	0.000445882	4.25014e-05	-0.0311698	0.975134	1
IAM	1120	66800	1608.08	429.012	2480.98	251.723	8.41913	3.79e-17	5.97e-17		1.54282		0.000151942	3.73355e-05	0.00016957	1.26995e-05	-0.00874351	0.993024	1
IAD	1113	66900	2056.53	569.039	3824.3	697.165	15.0718	2.48e-51	4.97e-51		1.85959		0.000194345	4.88002e-05	0.000260243	3.69598e-05	-0.0277591	0.977854	1
LD	155	67000	17228.7	1515.96	23364.1	2250.37	21.237	4.35e-100	1.28e-99		1.35611		0.0016391	0.000125809	0.00159742	0.000120465	0.00645717	0.994848	1
MED	444	67100	43782.4	8762.41	74823.6	11136.3	17.2604	9.34e-67	2.16e-66		1.70899		0.0041437	0.000711936	0.00509612	0.000530798	-0.0886106	0.929391	1
IMD	59	67200	8497.44	1572.47	12442.1	1158.92	245.754	0	0		1.46422		0.000804316	0.000130539	0.000850714	6.30725e-05	-0.0101087	0.991935	1
MD	362	67300	29216.6	5891.9	51598.2	8799.3	18.0962	3.41e-73	8.42e-73		1.76606		0.00276581	0.000478709	0.00351092	0.000437375	-0.0842486	0.932859	1
MDc	617	67400	4687.91	1119.09	8969.51	2208.56	16.6427	3.42e-62	7.58e-62		1.91333		0.00044378	9.39413e-05	0.000608566	0.000124822	-0.0456726	0.963571	1
MDl	626	67500	8375.63	982.812	15607.8	4217.49	21.6364	8.16e-104	2.5e-103		1.86348		0.000795234	6.86296e-05	0.00105784	0.000235176	-0.0547738	0.956319	1
MDm	636	67600	16153	4032.23	27020.9	2889.8	13.1284	2.26e-39	4.14e-39		1.67281		0.0015268	0.000345205	0.00184451	0.000128779	-0.0488884	0.961008	1
SMT	366	67700	5430	1455.67	9661.75	1762.16	13.8077	2.29e-43	4.3e-43		1.77933		0.000513265	0.000125468	0.000658109	0.000100967	-0.0379299	0.969744	1
PR	1077	67800	638.343	180.517	1121.51	213.009	12.4656	1.15e-35	2.05e-35		1.75691		6.03106e-05	1.56978e-05	7.63755e-05	1.23552e-05	-0.0123076	0.99018	1
MTN	571	67900	55933.2	13647	85518.2	8879.17	9.5183	1.76e-21	2.81e-21		1.52893		0.00528714	0.00117194	0.00584069	0.000401458	-0.0466383	0.962802	1
PVT	149	68000	26736.6	5982.25	39784.1	3555.09	8.19097	2.59e-16	4.06e-16		1.488		0.00252843	0.000508642	0.00271936	0.000165259	-0.0233848	0.981343	1
PT	15	68100	5497.52	1561.07	8966.64	1232.94	10.09	6.12e-24	9.98e-24		1.63103		0.00051914	0.000135544	0.00061173	6.30989e-05	-0.0245652	0.980402	1
RE	181	68200	23699.1	6346.48	36767.5	4729.76	9.25919	2.06e-20	3.28e-20		1.55143		0.00223956	0.000553139	0.0025096	0.000241043	-0.0348563	0.972194	1
ILM	51	68300	43029.7	6976.65	69249	9604.93	18.6116	2.59e-77	6.55e-77		1.60933		0.00407663	0.00053303	0.00471834	0.000431475	-0.0609866	0.95137	1
RH	189	68400	7163.69	1777	10952.7	1143.47	8.23733	1.76e-16	2.76e-16		1.52892		0.00067715	0.000153939	0.000748361	5.85024e-05	-0.0167636	0.986625	1
CM	599	68500	13377.6	3055.7	20427.3	1975.08	10.3791	3.09e-25	5.09e-25		1.52698		0.00126493	0.00026005	0.00139566	9.41829e-05	-0.0225247	0.982029	1
PCN	907	68600	3402.58	310.178	5952.41	1674.1	19.906	3.61e-88	9.8e-88		1.74938		0.000323383	2.04198e-05	0.000403291	9.4322e-05	-0.0265298	0.978835	1
CL	575	68700	4695.51	330.72	6788.87	985.622	23.0414	1.8e-117	6.21e-117		1.44582		0.000446914	2.86076e-05	0.000463178	5.14605e-05	0	1	1
PF	930	68800	14390.3	2135.14	25127.7	4864.46	21.3497	3.93e-101	1.17e-100		1.74615		0.00136426	0.00015547	0.00170785	0.000246923	-0.0554912	0.955747	1
RT	262	68900	31827.6	3390.93	37754.7	2666.74	11.6345	2.75e-31	4.75e-31		1.18623		0.00302445	0.000247035	0.00258463	0.000165688	0.0512449	0.95913	1
GENv	1014	69000	11783.8	1731.23	14552.8	1032.17	11.3672	6.09e-30	1.04e-29		1.23498		0.00111807	0.000124992	0.000996792	7.24456e-05	0.0230887	0.981579	1
IGL	27	69100	2060.41	294.969	2567.57	204.464	11.9042	1.13e-32	1.97e-32		1.24615		0.00019549	2.09093e-05	0.000175786	1.33016e-05	0.00895951	0.992851	1
LGv	178	69200	9113.11	1364.26	11257.3	793.119	11.2189	3.3e-29	5.59e-29		1.23529		0.000864621	9.91596e-05	0.000771133	5.65249e-05	0.0202386	0.983853	1
SubG	321	69500	610.324	78.9217	727.902	55.519	10.2222	1.58e-24	2.58e-24		1.19265		5.79545e-05	5.79516e-06	4.9873e-05	4.0613e-06	0.00679504	0.994578	1
EPI	958	69600	19227.7	3919.61	31855.6	4348.94	16.1535	1.07e-58	2.31e-58		1.65676		0.00181966	0.000321332	0.00217162	0.000203972	-0.0497412	0.960329	1
MH	483	69700	9725.44	1965.44	14660.6	1479.76	9.84172	7.44e-23	1.2e-22		1.50745		0.000920205	0.000165032	0.00100195	7.55272e-05	-0.0165575	0.98679	1
LH	186	69800	9502.22	2096.7	17195	3228.3	17.5196	1.02e-68	2.38e-68		1.80957		0.000899452	0.000173475	0.00116967	0.000169523	-0.053278	0.95751	1
HY	1097	70000	409897	72291.8	712801	110884	19.4421	3.4e-84	9.02e-84		1.73898		0.0388377	0.00575048	0.0485678	0.00576404	-0.294594	0.768304	1
PVZ	157	70100	29552.8	8910.03	43603.7	6357.56	6.63925	3.15e-11	4.79e-11		1.47545		0.00279354	0.000797246	0.00297522	0.000335315	-0.0212102	0.983078	1
SO	390	70200	766.981	81.6344	1131.23	146.705	21.7869	3.09e-105	9.49e-105		1.47491		7.28835e-05	5.964e-06	7.73386e-05	8.57226e-06	-0.0032223	0.997429	1
ASO	332	70300	24.4352	3.69711	60.1475	16.3308	24.3799	2.8e-131	1.06e-130		2.46151		2.3211e-06	3.0436e-07	4.08608e-06	9.98189e-07	-0.00632253	0.994955	1
NC	432	70400	24.4352	3.69711	60.1475	16.3308	24.3799	2.8e-131	1.06e-130		2.46151		2.3211e-06	3.0436e-07	4.08608e-06	9.98189e-07	-0.00632253	0.994955	1
PVH	38	70500	10685.5	3319.72	15617.2	2504.23	5.69388	1.24e-08	1.84e-08		1.46153		0.00100904	0.000294263	0.00106555	0.00013669	-0.0109957	0.991227	1
PVHm	71	70600	1194.62	362.988	1863.44	321.169	7.37062	1.7e-13	2.62e-13		1.55986		0.000112822	3.22173e-05	0.000127076	1.84477e-05	-0.00818955	0.993466	1
PVHmm	79	70800	277.407	87.446	484.049	86.1004	8.58315	9.23e-18	1.46e-17		1.7449		2.61969e-05	7.82148e-06	3.30152e-05	4.99224e-06	-0.00793441	0.993669	1
PVHpm	103	70900	917.241	276.666	1379.39	236.619	7.00261	2.51e-12	3.86e-12		1.50385		8.66246e-05	2.45205e-05	9.40612e-05	1.35814e-05	-0.00491176	0.996081	1
PVHpml	652	71000	814.87	247.213	1247.1	214.759	7.3685	1.73e-13	2.66e-13		1.53043		7.69544e-05	2.19215e-05	8.50397e-05	1.23629e-05	-0.00564619	0.995495	1
PVHpmm	660	71100	102.398	30.4087	132.295	22.7943	4.73933	2.14e-06	3.15e-06		1.29197		9.67025e-06	2.70397e-06	9.02145e-06	1.2945e-06	0.00131844	0.998948	1
PVHp	94	71200	9490.89	2966.2	13753.8	2197	5.53884	3.04e-08	4.5e-08		1.44916		0.000896216	0.000263041	0.000938474	0.000119459	-0.00873833	0.993028	1
PVHap	55	71300	4189.8	1319.35	6176	1066.09	6.19838	5.7e-10	8.58e-10		1.47406		0.000395501	0.00011654	0.000421162	5.95792e-05	-0.00796247	0.993647	1
PVHmpd	87	71400	2783.88	855.9	4149.3	643.82	5.82461	5.72e-09	8.52e-09		1.49047		0.00026295	7.61366e-05	0.000283186	3.5251e-05	-0.00768381	0.993869	1
PVHpv	110	71500	2517.25	839.206	3428.48	544.654	106.211	0	0		1.36199		0.000237766	7.53467e-05	0.000234125	2.99528e-05	0.0014781	0.998821	1
PVa	30	71600	1039.57	381.731	1449.43	276.271	73.9117	0	0		1.39425		9.82284e-05	3.47255e-05	9.88913e-05	1.55232e-05	-0.000417091	0.999667	1
PVi	118	71700	6748.08	2076.29	9724.08	1430.62	208.899	0	0		1.44101		0.00063817	0.000188383	0.000663896	7.75751e-05	-0.00631212	0.994964	1
ARH	223	71800	10288.3	3326.62	15621.6	2595.92	6.16508	7.04e-10	1.06e-09		1.51839		0.000972899	0.000302103	0.00106545	0.000147561	-0.0182103	0.985471	1
PVR	141	71900	74691.3	21064.4	126015	21678.9	10.9362	7.74e-28	1.3e-27		1.68714		0.00706033	0.0018466	0.00858527	0.00118584	-0.108964	0.913231	1
ADP	72	72000	1334.8	427.323	2015.46	395.546	6.28586	3.26e-10	4.92e-10		1.50994		0.000125982	3.77863e-05	0.000137313	2.30359e-05	-0.00620137	0.995052	1
AVP	263	72200	1377.26	408.564	2684.2	594.423	12.9042	4.26e-38	7.75e-38		1.94894		0.000130158	3.57361e-05	0.000182638	3.55804e-05	-0.0267063	0.978694	1
AVPV	272	72300	1781.55	635.763	2807.51	515.063	136.892	0	0		1.57588		0.000168154	5.70244e-05	0.000191397	2.98122e-05	-0.0109145	0.991292	1
DMH	830	72400	15888.9	4386.24	27123.8	4935.27	11.6249	3.08e-31	5.31e-31		1.70709		0.00150256	0.000387152	0.00184772	0.000279076	-0.0533305	0.957469	1
DMHa	668	72500	8807.13	2390.35	15137.3	2755.21	11.9021	1.15e-32	2.02e-32		1.71875		0.00083278	0.000210016	0.00103112	0.000155025	-0.0411001	0.967216	1
DMHp	676	72600	3371.49	970.745	5423.67	947.267	9.03664	1.62e-19	2.56e-19		1.60869		0.000318767	8.67861e-05	0.000369625	5.31135e-05	-0.0172784	0.986215	1
DMHv	684	72700	3710.32	1059	6562.87	1279.05	12.562	3.42e-36	6.13e-36		1.76881		0.000351011	9.38201e-05	0.00044698	7.47124e-05	-0.0304378	0.975718	1
MEPO	452	72800	6579.59	2281.54	9343.72	1489.88	197.222	0	0		1.42011		0.000621314	0.000204543	0.00063763	7.93875e-05	-0.00406733	0.996755	1
MPO	523	72900	25266.6	6437.64	46604.6	9251.5	14.5062	1.11e-47	2.17e-47		1.84452		0.00238907	0.000548087	0.00317203	0.000530135	-0.0942608	0.924902	1
OV	763	73000	533.926	211.102	788.148	132.079	63.0512	0	0		1.47614		5.04156e-05	1.92261e-05	5.37663e-05	7.45688e-06	-0.00291119	0.997677	1
PD	914	73100	90.1296	27.9994	179.754	50.4789	13.6054	3.72e-42	6.91e-42		1.9944		8.51869e-06	2.46549e-06	1.22095e-05	3.1054e-06	-0.00730259	0.994173	1
PS	1109	73200	522.111	91.2192	1070.75	346.109	18.0795	4.62e-73	1.14e-72		2.05082		4.94803e-05	7.01612e-06	7.25691e-05	2.13508e-05	-0.0188437	0.984966	1
PVp	126	73400	5253.65	1500.53	9120.79	1295.71	9.9585	2.32e-23	3.76e-23		1.73609		0.00049735	0.000136681	0.000622596	7.30213e-05	-0.0335015	0.973275	1
PVpo	133	73500	5179.19	1908.36	7389.87	1225.75	177.573	0	0		1.42684		0.000489126	0.000172771	0.000504317	6.70429e-05	-0.00426448	0.996597	1
SBPV	347	73600	5274.69	1809.29	8101.75	1536.43	220.74	0	0		1.53597		0.000498073	0.000162825	0.000552237	8.76073e-05	-0.0148575	0.988146	1
SCH	286	73700	4158.59	1530.05	6252.41	1194.88	185.178	0	0		1.50349		0.000392752	0.000138602	0.000426222	6.79872e-05	-0.0103832	0.991716	1
SFO	338	73800	1059.63	232.123	1492.39	166.077	8.00341	1.21e-15	1.89e-15		1.40841		0.000100254	1.98283e-05	0.000102055	9.47777e-06	-0.00111901	0.999107	1
VLPO	689	73900	390.889	50.4815	1039.79	354.876	26.3261	9.63e-153	4.31e-152		2.66006		3.71301e-05	3.84441e-06	7.05695e-05	2.23204e-05	-0.0292599	0.976657	1
MEZ	467	74000	98953.5	22019.5	197929	34604.7	18.8104	6.21e-79	1.59e-78		2.00022		0.00936692	0.00187653	0.0134801	0.00191718	-0.245171	0.806324	1
AHN	88	74100	20926.2	4236.36	42112.4	9156.11	20.1307	3.97e-90	1.1e-89		2.01242		0.00198199	0.000348166	0.00286419	0.000532574	-0.114195	0.909083	1
AHNa	700	74200	5603.93	729.737	12178.3	2826.51	27.2602	1.26e-163	6.39e-163		2.17318		0.000531747	5.2035e-05	0.000828153	0.000167703	-0.0726298	0.942101	1
AHNc	708	74300	10881.7	2259.32	22238.7	5024.31	20.0052	4.96e-89	1.35e-88		2.04368		0.00103056	0.000186666	0.00151199	0.000293064	-0.0860871	0.931397	1
AHNp	724	74500	4440.66	1322.01	7695.39	1560.57	11.4062	3.9e-30	6.67e-30		1.73294		0.000419688	0.000116499	0.000524056	9.20094e-05	-0.0304073	0.975742	1
MBO	331	74600	23138.7	5086.41	54525.5	9434.82	22.76	1.14e-114	3.83e-114		2.35647		0.00219166	0.000442514	0.00371439	0.000525421	-0.179497	0.857547	1
LM	210	74700	866.046	86.7551	2422.28	833.404	29.4122	3.84e-190	2.35e-189		2.79694		8.23837e-05	7.22118e-06	0.000163964	5.02452e-05	-0.0472283	0.962331	1
MM	491	74800	13701.6	3302.47	32129.6	5218.14	20.2191	6.65e-91	1.84e-90		2.34495		0.00129742	0.000293135	0.00219079	0.000295655	-0.137015	0.891019	1
Mmme	732	74900	702.824	187.212	1446.48	202.412	145.794	0	0		2.05809		6.6567e-05	1.72805e-05	9.87378e-05	1.12438e-05	-0.0225705	0.981993	1
SUM	525	75000	7398.81	1589.24	17358.5	3213.87	23.3143	3.18e-120	1.12e-119		2.34612		0.000700674	0.000135963	0.00118185	0.000181698	-0.100453	0.919985	1
SUMl	1110	75100	4637.96	993.281	11696.7	2521.59	25.1535	1.29e-139	5.31e-139		2.52195		0.000439339	8.41178e-05	0.000795521	0.000147688	-0.0919622	0.926728	1
SUMm	1118	75200	2760.84	683.56	5661.77	761.89	13.2555	4.19e-40	7.71e-40		2.05074		0.000261335	6.13231e-05	0.000386333	4.03245e-05	-0.0442989	0.964666	1
TM	557	75300	1172.25	205.712	2615.21	567.553	24.4982	1.54e-132	5.93e-132		2.23093		0.000111175	1.72765e-05	0.000177784	3.21418e-05	-0.0354378	0.971731	1
TMd	1126	75400	638.954	189.725	1032.02	158.673	86.9879	0	0		1.61517		6.04574e-05	1.73476e-05	7.03943e-05	8.7738e-06	-0.00774508	0.99382	1
TMv	1	75500	533.315	51.8442	1583.2	450.27	35.3363	1.63e-273	1.43e-272		2.9686		5.07181e-05	4.09362e-06	0.00010739	2.68447e-05	-0.0409737	0.967317	1
MPN	515	75600	8424.84	2783.77	14413.3	2813.63	8.12898	4.33e-16	6.77e-16		1.7108		0.000795478	0.000247672	0.000982081	0.000167025	-0.0395902	0.96842	1
MPNc	740	75700	241.741	78.184	404.639	82.0835	7.8946	2.91e-15	4.53e-15		1.67386		2.28247e-05	6.98212e-06	2.75728e-05	4.95919e-06	-0.00597555	0.995232	1
MPNl	748	75800	3241.88	1079.17	5955.69	1249.16	10.0512	9.08e-24	1.48e-23		1.83711		0.000306213	9.58925e-05	0.000405653	7.5796e-05	-0.0334568	0.97331	1
MPNm	756	75900	4647.67	1570.38	7563.15	1428.8	238.707	0	0		1.6273		0.00043873	0.000140353	0.000515494	8.39967e-05	-0.0221678	0.982314	1
PMd	980	76000	2104.29	458.498	4751.16	1000.39	22.1625	7.9e-109	2.5e-108		2.25785		0.000199393	3.92548e-05	0.00032331	5.9024e-05	-0.0490395	0.960888	1
PMv	1004	76100	2202.71	428.31	5233.02	1204.88	24.889	9.8e-137	3.93e-136		2.37571		0.000208889	3.59472e-05	0.000355808	7.15699e-05	-0.0560155	0.955329	1
PVHd	63	76200	1491.1	318	2586.72	481.418	16.0873	3.13e-58	6.69e-58		1.73477		0.000141146	2.64744e-05	0.000176067	2.59019e-05	-0.0175481	0.985999	1
PVHdp	439	76300	483.213	144.081	686.738	97.8516	53.5773	0	0		1.42119		4.56552e-05	1.28098e-05	4.68847e-05	5.24289e-06	-0.00113054	0.999098	1
PVHf	447	76400	121.269	12.238	193.016	62.4301	15.0305	4.64e-51	9.27e-51		1.59164		1.15348e-05	1.0175e-06	1.31097e-05	3.71131e-06	-0.00282457	0.997746	1
PVHlp	455	76500	720.185	137.899	1424.79	318.912	20.676	5.7e-95	1.64e-94		1.97836		6.82338e-05	1.12033e-05	9.68506e-05	1.81133e-05	-0.0200552	0.983999	1
PVHmpv	464	76600	166.463	53.6181	282.18	54.7051	9.8278	8.55e-23	1.37e-22		1.69515		1.57219e-05	4.80542e-06	1.9222e-05	3.2017e-06	-0.00529355	0.995776	1
VMH	693	76700	13636.9	3262.8	24834.1	5254.58	15.0293	4.72e-51	9.41e-51		1.82109		0.0012911	0.000281304	0.00168986	0.000306648	-0.0655235	0.947757	1
VMHa	761	76800	638.981	194.774	1119.85	232.316	11.6434	2.48e-31	4.29e-31		1.75256		6.04293e-05	1.72138e-05	7.62546e-05	1.39012e-05	-0.0121219	0.990328	1
VMHc	769	76900	4327.38	1251.65	7443.98	1544.28	11.695	1.35e-31	2.34e-31		1.72021		0.000409436	0.000110668	0.000506828	9.14329e-05	-0.0287842	0.977037	1
VMHdm	777	77000	4085.55	1297.12	6271.72	1184.39	193.988	0	0		1.5351		0.00038605	0.000116991	0.000427363	6.81302e-05	-0.0128761	0.989727	1
VMHvl	785	77100	4585.01	647.836	9998.54	2548.46	24.3634	4.18e-131	1.57e-130		2.1807		0.000435188	4.97809e-05	0.000679411	0.000153948	-0.0661064	0.947293	1
PH	946	77150	27028.8	6208.42	49472.5	7019.35	15.178	4.95e-52	1e-51		1.83036		0.00255726	0.00053651	0.00337438	0.000372008	-0.0952218	0.924139	1
LZ	290	77200	157500	13787.3	258318	39126.1	27.5351	6.67e-167	3.48e-166		1.64011		0.0149601	0.000695987	0.0176047	0.00199314	-0.130742	0.895979	1
LHA	194	77300	69000.5	5638.97	121336	21317.4	28.9813	1.13e-184	6.52e-184		1.75848		0.00655787	0.000326101	0.00826328	0.00114606	-0.125439	0.900176	1
LPO	226	77400	23449.7	3432.39	39767.2	6299.37	21.7966	2.5e-105	7.7e-105		1.69585		0.00222271	0.000243137	0.00271038	0.0003384	-0.0620663	0.95051	1
PST	356	77600	273.88	30.1168	328.475	28.397	11.5258	9.78e-31	1.68e-30		1.19934		2.60198e-05	2.16001e-06	2.25177e-05	2.19449e-06	0	1	1
PSTN	364	77700	1094.29	108.023	1579.38	223.345	20.9249	3.18e-97	9.21e-97		1.44329		0.000104022	7.94289e-06	0.000107955	1.29532e-05	-0.00239082	0.998092	1
RCH	173	77800	7423.84	1754.05	13425.9	2582.12	15.288	9.19e-53	1.88e-52		1.80848		0.000702727	0.000149514	0.000914004	0.000148292	-0.0471272	0.962412	1
STN	470	77900	4637.2	468.472	5331.25	417.001	9.78005	1.37e-22	2.2e-22		1.14967		0.000440738	3.33564e-05	0.000365345	3.13816e-05	0.0231141	0.981559	1
TU	614	78000	9313.59	926.726	16603.9	3260.9	25.5845	2.27e-144	9.68e-144		1.78276		0.000884548	5.72829e-05	0.00113065	0.000186805	-0.0491273	0.960818	1
ZI	797	78100	42307.2	3374.74	59945.8	7182.77	23.544	1.45e-122	5.17e-122		1.41692		0.00402144	0.000196667	0.00409054	0.000325069	-0.00678196	0.994589	1
FF	804	78300	1371.54	125.795	2061.8	416.384	19.4783	1.68e-84	4.46e-84		1.50328		0.000130398	9.14158e-06	0.000140356	2.20025e-05	-0.00536971	0.995716	1
MB	313	78500	996370	91983.9	1.68633e+06	251139	28.7332	1.47e-181	8.35e-181		1.69247		0.0946011	0.00469356	0.1149	0.0124227	-0.39634	0.691854	1
MBsen	339	78600	201822	16172.3	307074	40884.2	25.8572	2.02e-147	8.78e-147		1.52151		0.0191855	0.00102845	0.0209444	0.00203551	-0.0779793	0.937845	1
SCs	302	78700	78218.4	8462.55	108714	20928	14.2769	3.05e-46	5.92e-46		1.38988		0.00742597	0.000556757	0.00739656	0.00115263	0.00213238	0.998299	1
SCop	851	78800	14758.5	1481.14	21139	4075.19	15.9906	1.48e-57	3.15e-57		1.43233		0.00140131	8.97383e-05	0.00143827	0.000225011	-0.00613422	0.995106	1
SCsg	842	78900	37254	4117.16	51098	10200.6	13.3131	1.94e-40	3.58e-40		1.37161		0.00353672	0.000273379	0.00347614	0.000569568	0.00637961	0.99491	1
SCzo	834	79000	26205.9	2928.49	36477	6708.11	14.4843	1.52e-47	2.98e-47		1.39194		0.00248794	0.000202206	0.00248216	0.000362441	0.000724505	0.999422	1
IC	4	79100	116241	8321.73	188125	22595.5	32.7624	2.02e-235	1.52e-234		1.6184		0.0110587	0.000628337	0.0128479	0.00120255	-0.103155	0.91784	1
ICc	811	79200	32206.3	2578.65	50718.4	7756.9	25.4803	3.26e-143	1.37e-142		1.5748		0.00306288	0.000186123	0.00346073	0.00043868	-0.0438394	0.965032	1
ICd	820	79300	28768.4	3082.53	52630.9	10504	24.6007	1.24e-133	4.82e-133		1.82947		0.00273399	0.000242447	0.00358604	0.000619163	-0.096166	0.923389	1
ICe	828	79400	55266.2	3768.07	84775.4	8518.08	33.001	7.86e-239	5.96e-238		1.53395		0.00526187	0.000350375	0.0058011	0.000537206	-0.0455591	0.963662	1
NB	580	79500	2035.66	190.699	3038.39	298.758	26.4014	1.32e-153	5.95e-153		1.49259		0.000193815	1.80647e-05	0.000208101	2.06106e-05	0	1	1
SAG	271	79600	1818.81	168.389	2403.95	257.136	18.0138	1.52e-72	3.68e-72		1.32171		0.000173155	1.56372e-05	0.000164535	1.66185e-05	0.00412678	0.996707	1
PBG	874	79700	1250.52	147.581	1636.52	151.041	15.6493	3.36e-55	6.99e-55		1.30868		0.000119154	1.47639e-05	0.000112047	1.00459e-05	0.00410904	0.996721	1
MEV	460	79800	2257.94	208.593	3156.18	520.749	17.2758	7.16e-67	1.66e-66		1.39782		0.000214621	1.4339e-05	0.000215247	2.94085e-05	-0.000266531	0.999787	1
MBmot	323	79900	625260	62452.5	1.08061e+06	180853	27.0367	5.47e-161	2.67e-160		1.72826		0.0593484	0.00337372	0.073581	0.00935688	-0.349263	0.726892	1
SNr	381	80000	27863.9	2520.34	36210.4	2800.93	19.6236	9.72e-86	2.61e-85		1.29954		0.00265055	0.000201231	0.00248108	0.000205343	0.0207897	0.983413	1
VTA	749	80100	19714.1	3247.96	44074	9857.67	26.3086	1.53e-152	6.82e-152		2.23566		0.00186848	0.000248028	0.00299374	0.000551522	-0.145954	0.883958	1
RR	246	80200	10729.1	950.882	14761.3	1436.56	22.3884	5.1e-111	1.65e-110		1.37582		0.00101999	6.62147e-05	0.00100933	7.81899e-05	0.00208871	0.998333	1
MRN	128	80300	134949	13877.1	231943	40251.5	26.4116	1.01e-153	4.56e-153		1.71875		0.0128131	0.000816367	0.015785	0.00203607	-0.157182	0.875102	1
MRNmg	548	80500	28.3426	5.85361	37.8361	5.12894	10.4787	1.08e-25	1.78e-25		1.33495		2.68487e-06	5.06083e-07	2.58875e-06	3.31387e-07	0.00036863	0.999706	1
SCm	294	80700	175498	15530.6	281059	53114.4	22.2167	2.37e-109	7.51e-109		1.6015		0.0166695	0.000819872	0.0191318	0.00294001	-0.115926	0.907712	1
SCdg	26	80800	60757.9	5548.75	99701.4	21390	21.0839	1.12e-98	3.26e-98		1.64096		0.0057711	0.000310788	0.00678275	0.00122555	-0.0805454	0.935803	1
SCdw	42	80900	3392.5	398.465	6088.25	1526.71	20.7265	2e-95	5.75e-95		1.79462		0.000321894	2.55273e-05	0.000413566	8.90993e-05	-0.0302991	0.975828	1
SCiw	17	81000	21304.4	1766.73	32868.9	5907.16	21.5401	6.56e-103	2e-102		1.54282		0.00202479	0.000104811	0.00223972	0.000336196	-0.029254	0.976662	1
SCig	10	81100	90043.1	8074.68	142401	24852.1	22.8074	3.87e-115	1.31e-114		1.58147		0.00855177	0.00042321	0.00969576	0.00133093	-0.0753881	0.939906	1
SCig-a	494	81200	14498.6	1346.62	23069.7	4164.72	22.3015	3.58e-110	1.15e-109		1.59116		0.00137698	7.62215e-05	0.00157062	0.000226376	0	1	1
SCig-b	503	81300	29246.6	2643.59	49828.2	8745.91	26.5754	1.31e-155	6.01e-155		1.70372		0.00277795	0.000145905	0.00339264	0.000462734	-0.0699547	0.94423	1
SCig-c	511	81400	10713.3	1637.72	19134.7	4170.14	20.0324	2.88e-89	7.83e-89		1.78606		0.00101477	0.00011692	0.00130094	0.000234556	-0.0532981	0.957494	1
PAG	795	81500	187747	24766.3	356122	69194.2	24.6144	8.85e-134	3.46e-133		1.89682		0.0177988	0.00172567	0.0242445	0.00389736	-0.282554	0.777519	1
PRC	50	81600	2921.7	581.013	4895.41	618.989	16.641	3.51e-62	7.79e-62		1.67553		0.000276355	4.64699e-05	0.00033412	3.13904e-05	-0.0208892	0.983334	1
INC	67	81700	1676.44	400.592	2926.02	279.955	14.9313	2.06e-50	4.09e-50		1.74537		0.00015841	3.36313e-05	0.000199948	1.34098e-05	-0.0196504	0.984322	1
ND	587	81800	3887.7	701.414	6756.57	719.972	14.0694	5.85e-45	1.12e-44		1.73793		0.000368003	5.72618e-05	0.00046195	4.08604e-05	0	1	1
PRT	1100	81900	43967.3	3821.38	71886.5	9964.45	29.0144	4.33e-185	2.54e-184		1.635		0.00417625	0.000199447	0.00490069	0.000477829	-0.0678254	0.945925	1
APN	215	82000	22536.2	1658.13	34032.6	4034.2	28.3014	3.33e-176	1.83e-175		1.51013		0.00214405	0.000131287	0.00232435	0.000212555	-0.0239445	0.980897	1
MPT	531	82100	4602.21	818.418	7628.44	1136.51	15.5499	1.59e-54	3.29e-54		1.65756		0.00043548	6.42316e-05	0.000520693	6.38142e-05	-0.0246068	0.980369	1
NOT	628	82200	3731.59	290.321	6053.49	794.538	30.1611	7.67e-200	4.97e-199		1.62223		0.000355091	2.46973e-05	0.000413088	4.13446e-05	-0.0186557	0.985116	1
NPC	634	82300	8542.01	1153.84	15845	3303.84	24.0952	2.81e-128	1.03e-127		1.85494		0.000809976	7.83743e-05	0.00107668	0.00017353	-0.0551293	0.956035	1
OP	706	82400	2911.79	555.33	5180.92	1130.5	17.9021	1.14e-71	2.72e-71		1.77929		0.000275738	4.37363e-05	0.000352367	6.39232e-05	-0.0273987	0.978142	1
PPT	1061	82500	1643.44	239.446	3146.13	847.319	20.6471	1.04e-94	2.97e-94		1.91435		0.000155909	1.79399e-05	0.000213502	4.90752e-05	-0.02694	0.978508	1
CUN	616	82600	7540.62	592.806	10246	1224.4	20.574	4.69e-94	1.33e-93		1.35877		0.000716992	3.92911e-05	0.000701119	7.95237e-05	0.00371592	0.997035	1
RN	214	82700	8551.54	1327.03	18396.1	4812.39	24.3816	2.68e-131	1.02e-130		2.1512		0.000810621	9.60013e-05	0.00124742	0.000273217	-0.0869686	0.930696	1
III	35	82800	2466.82	382.323	4470.05	750.642	218.21	0	0		1.81207		0.000233835	3.17539e-05	0.000305267	4.54854e-05	-0.027598	0.977983	1
EW	975	82900	2246.36	333.935	4044.34	500.039	205.639	0	0		1.8004		0.000212944	2.7537e-05	0.000276443	2.89311e-05	-0.0257418	0.979463	1
IV	115	83000	419.435	75.8451	752.426	136.153	15.8346	1.79e-56	3.76e-56		1.7939		3.97181e-05	6.27606e-06	5.13432e-05	8.21652e-06	-0.0109229	0.991285	1
VTN	757	83100	2142.58	444.609	4091.52	700.985	16.5146	2.88e-61	6.35e-61		1.90962		0.000202661	3.70104e-05	0.000278875	3.8828e-05	-0.0312323	0.975084	1
AT	231	83200	1222.28	239.642	2296.79	377.611	19.3139	4.1e-83	1.08e-82		1.8791		0.000115658	1.94453e-05	0.000156604	2.09663e-05	-0.0222988	0.98221	1
LT	66	83300	201.806	18.7987	259.787	22.8853	17.7857	9.13e-71	2.18e-70		1.28731		1.91935e-05	1.49096e-06	1.7803e-05	1.68541e-06	0.00200762	0.998398	1
MBsta	348	83700	50888.5	6005.49	90086.3	10262.4	29.1487	8.68e-187	5.18e-186		1.77027		0.0048286	0.000422402	0.00615144	0.000504159	-0.113108	0.909945	1
SNc	374	83800	8127.43	730.123	11273.2	1396.4	20.5549	6.95e-94	1.97e-93		1.38705		0.000772877	5.47498e-05	0.000769831	7.12334e-05	0.000684443	0.999454	1
PPN	1052	83900	11978.4	1076.14	16875.8	2071.45	21.3119	8.8e-101	2.63e-100		1.40886		0.00113862	7.29229e-05	0.0011525	0.000111695	-0.002562	0.997956	1
RAmb	165	84000	30782.7	5220.01	61937.3	7910.94	18.0126	1.55e-72	3.75e-72		2.01208		0.0029171	0.000441874	0.00422912	0.000418556	-0.139874	0.88876	1
IF	12	84100	1494.3	299.353	2900.38	338.34	15.1098	1.4e-51	2.81e-51		1.94097		0.000141503	2.58644e-05	0.000198223	1.86801e-05	-0.0276944	0.977906	1
IPN	100	84200	13066	2892.41	28866	4399.52	18.406	1.18e-75	2.93e-75		2.20925		0.00123696	0.000253107	0.00197022	0.000249327	-0.117083	0.906794	1
RL	197	84300	1921.51	324.898	3519.52	384.86	196.59	0	0		1.83165		0.000182102	2.75431e-05	0.00024064	2.17459e-05	-0.0255544	0.979613	1
CLI	591	84400	6054.29	1053.62	10938.2	1421.22	339.895	0	0		1.80669		0.000573697	8.94063e-05	0.000747641	8.22176e-05	-0.0429223	0.965763	1
DR	872	84500	8246.72	1239.24	15713.2	3243.53	437.994	0	0		1.90538		0.00078284	0.000111735	0.0010724	0.000204185	-0.0604403	0.951805	1
HB	1065	84600	1.17561e+06	124035	1.43091e+06	199015	10.279	8.76e-25	1.43e-24		1.21716		0.111648	0.00846477	0.0978757	0.0126903	0.263082	0.792487	1
P	771	84700	550474	57501.1	1.04843e+06	151277	33.5675	5.01e-247	3.98e-246		1.9046		0.0522559	0.00345642	0.0714369	0.00742478	-0.49029	0.623929	1
P-sen	1132	84800	87722.6	6891.71	127358	12216	28.1515	2.3e-174	1.24e-173		1.45183		0.00834197	0.000461458	0.00871063	0.00070393	-0.0250009	0.980054	1
NLL	612	84900	19791.5	1508.43	25316.7	2693.74	17.6882	5.17e-70	1.23e-69		1.27917		0.00188376	0.000132312	0.00173284	0.000175157	0.0220246	0.982428	1
NLLd	82	85000	4802.78	372.714	6099.3	718.876	16.1234	1.75e-58	3.74e-58		1.26995		0.000457322	3.55916e-05	0.00041731	4.59251e-05	0.0118669	0.990532	1
NLLh	90	85100	1204.29	104.716	1503.25	180.112	14.0278	1.05e-44	2.02e-44		1.24825		0.000114646	9.69329e-06	0.000102863	1.15571e-05	0	1	1
NLLv	99	85200	13784.4	1110.2	17714.1	1922.35	17.3981	8.52e-68	1.99e-67		1.28509		0.00131179	9.46903e-05	0.00121267	0.000126929	0.0173207	0.986181	1
PSV	7	85300	28669.1	3043.89	40082.2	4494.61	20.2352	4.79e-91	1.33e-90		1.3981		0.00272448	0.000212535	0.00274185	0.000274063	-0.00207555	0.998344	1
PB	867	85400	22329.7	1859.23	29461	3887.08	17.1302	8.84e-66	2.01e-65		1.31936		0.00212307	0.00012405	0.00201212	0.000222064	0.0151758	0.987892	1
KF	123	85500	3833.12	331.686	4803.75	621.148	13.9033	6.05e-44	1.14e-43		1.25322		0.000364495	2.34756e-05	0.000328143	3.56087e-05	0.0121027	0.990344	1
PBl	881	85600	12153.4	1017.68	16210.5	2088.96	18.0448	8.68e-73	2.12e-72		1.33382		0.00115551	6.82097e-05	0.00110758	0.000122515	0.0088685	0.992924	1
PBlc	860	85700	3792.54	329.165	5230.89	700.108	19.3628	1.59e-83	4.21e-83		1.37926		0.000360523	2.18979e-05	0.000357272	4.03197e-05	0.00107074	0.999146	1
PBld	868	85800	1664.3	142.509	2276.84	295.575	19.2977	5.62e-83	1.47e-82		1.36805		0.000158252	1.00123e-05	0.0001556	1.77503e-05	0.00132016	0.998947	1
PBle	875	85900	1828.27	166.433	2329.69	307.77	14.4571	2.26e-47	4.42e-47		1.27426		0.000173853	1.2176e-05	0.000159154	1.80679e-05	0.00706681	0.994362	1
PBls	883	86000	2477.04	201.387	3238.23	414.607	17.0536	3.28e-65	7.43e-65		1.3073		0.000235532	1.3738e-05	0.000221413	2.57072e-05	0.00580598	0.995368	1
PBlv	891	86100	2391.26	213.06	3134.82	418.872	16.1426	1.28e-58	2.74e-58		1.31095		0.000227347	1.48383e-05	0.000214142	2.44443e-05	0	1	1
PBm	890	86200	6343.19	546.459	8446.75	1280.43	15.9215	4.49e-57	9.49e-57		1.33162		0.000603067	3.71707e-05	0.000576397	7.27439e-05	0.00683492	0.994547	1
PBme	899	86300	629.546	59.5366	896.689	132.597	19.2336	1.94e-82	5.07e-82		1.42434		5.98829e-05	4.68195e-06	6.12052e-05	7.58284e-06	-0.00106262	0.999152	1
PBmm	915	86400	5713.65	496.875	7550.07	1154.72	15.3462	3.76e-53	7.72e-53		1.32141		0.000543184	3.36696e-05	0.000515192	6.57231e-05	0.00756877	0.993961	1
SOC	398	86600	16932.3	1377.8	32498.4	3428.16	45.8253	0	0		1.91931		0.00161066	0.000106958	0.00222382	0.000213669	-0.0890557	0.929038	1
POR	122	86700	14448.1	1167.07	27485.9	2879	45.4972	0	0		1.90239		0.00137445	9.2114e-05	0.00188107	0.000181709	-0.0798264	0.936375	1
SOCm	105	86800	1030.05	92.2596	2224	473.02	32.0527	2.01e-225	1.46e-224		2.15913		9.79548e-05	7.06438e-06	0.000151559	2.82559e-05	-0.0306572	0.975543	1
SOCl	114	86900	1454.14	147.851	2788.43	327.141	38.8594	0	0		1.91758		0.000138258	1.13045e-05	0.000191189	2.41354e-05	-0.0262299	0.979074	1
P-mot	987	87000	175410	22732	380995	67292.2	32.1547	7.59e-227	5.58e-226		2.17202		0.0166368	0.00156457	0.0259275	0.00358261	-0.406927	0.684062	1
B	280	87100	653.12	61.0907	1610.75	677.223	20.4304	8.97e-93	2.51e-92		2.46624		6.20903e-05	4.41531e-06	0.00010879	4.25443e-05	-0.0323893	0.974162	1
DTN	880	87200	3543.68	624.776	7191.84	1382.5	15.3347	4.48e-53	9.19e-53		2.02948		0.000336083	5.48787e-05	0.00049021	8.09807e-05	-0.0483337	0.96145	1
PCG	898	87400	19955.2	2807.43	42393.6	9000.47	26.8635	5.86e-159	2.78e-158		2.12443		0.00189243	0.00020994	0.00288465	0.000519698	-0.129623	0.896864	1
PG	931	87500	21804.9	3522.43	54290.3	11372.6	30.7764	5.42e-208	3.65e-207		2.48982		0.00206783	0.000278436	0.0036899	0.000634632	-0.19389	0.846262	1
PRNc	1093	87600	89167.9	11461.5	198039	35124.6	33.2811	7.24e-243	5.71e-242		2.22097		0.00845731	0.000773669	0.01348	0.00190338	-0.306656	0.759105	1
SG	318	87800	565.481	117.801	1114.23	393.566	121.639	0	0		1.97041		5.35749e-05	1.03451e-05	7.64406e-05	2.65314e-05	-0.018061	0.98559	1
SUT	534	88000	3941.19	368.523	5013.64	817.045	12.4251	1.91e-35	3.39e-35		1.27211		0.000374705	2.63474e-05	0.0003421	4.76407e-05	0.010682	0.991477	1
TRN	574	88100	23478.9	4571.74	54062.5	11170.5	23.4919	4.94e-122	1.76e-121		2.3026		0.00222349	0.000379666	0.00367587	0.000625142	-0.171185	0.864079	1
V	621	88200	12300	1184.69	17279.9	3011.37	16.6669	2.28e-62	5.07e-62		1.40487		0.00116928	8.40895e-05	0.00117956	0.000183091	-0.00187514	0.998504	1
P-sat	1117	88300	118434	13940.2	234223	44843.9	28.6015	6.44e-180	3.59e-179		1.97767		0.0112362	0.000894863	0.015923	0.00236472	-0.256064	0.797901	1
CS	679	88400	22253.5	4286.8	44240.1	7110.2	15.4258	1.1e-53	2.26e-53		1.98801		0.00210797	0.000367159	0.00301647	0.00038412	-0.114316	0.908987	1
CSl	137	88500	11101.9	2209.69	21912.1	3538.11	16.3982	1.97e-60	4.29e-60		1.97373		0.00105084	0.000185804	0.00149373	0.000190191	-0.0790622	0.936983	1
CSm	130	88600	11151.7	2244.5	22328	3652.07	555.02	0	0		2.00221		0.00105713	0.000199569	0.00152274	0.000200835	-0.0825946	0.934174	1
LC	147	88700	1279.53	116.062	2149.7	673.248	16.6344	3.93e-62	8.69e-62		1.68008		0.000121652	8.38133e-06	0.000145729	4.01711e-05	-0.0131496	0.989508	1
LDT	162	88800	3930.81	642.464	8973.93	2211.7	25.5303	9.09e-144	3.85e-143		2.28297		0.000372482	4.89987e-05	0.000609498	0.000129924	-0.0684515	0.945426	1
NI	604	88900	4882.73	902.209	9641.66	2012.16	18.9313	6.3e-80	1.63e-79		1.97464		0.000462653	7.55397e-05	0.000656561	0.000118068	-0.0521911	0.958376	1
PRNr	146	89000	81023.3	8546.66	159850	33097.9	28.3463	9.29e-177	5.13e-176		1.97289		0.00769079	0.000498712	0.0108584	0.00178294	-0.20938	0.834151	1
RPO	238	89100	2479.08	531.396	4913.54	919.032	257.227	0	0		1.982		0.000234934	4.7116e-05	0.000334847	5.26768e-05	-0.0376967	0.96993	1
SLC	350	89200	771.685	74.8722	1071.56	197.983	15.2319	2.17e-52	4.43e-52		1.38859		7.3348e-05	5.31934e-06	7.30369e-05	1.15863e-05	0	1	1
SLD	358	89300	1813.47	165.933	3382.64	1288.89	16.3388	5.22e-60	1.13e-59		1.86528		0.000172392	1.15109e-05	0.000228459	7.80983e-05	-0.0251387	0.979944	1
MY	354	89400	625135	73602.9	382480	200528	-8.08225	6.36e-16	9.93e-16		0.611835		0.0593922	0.00576597	0.0264388	0.0141936	0.918771	0.358215	1
MY-sen	386	89500	107405	8907.82	62098.9	18037	-18.019	1.38e-72	3.36e-72		0.578176		0.0102215	0.000769207	0.00427253	0.00130858	0.400538	0.68876	1
AP	207	89600	876.574	356.202	1	0	-52.9054	0	0		0.0011408		8.34385e-05	3.38489e-05	0	0	0.000271804	0.999783	1
CN	607	89700	33466.4	2585.62	36531.9	9771.47	2.99763	0.00272092	0.00391173		1.0916		0.00318662	0.000244391	0.00251334	0.000708742	0.0772987	0.938386	1
CNlam	112	89800	762.565	84.9403	713.803	396.865	-11.1515	7.04e-29	1.19e-28		0.936056		7.25873e-05	7.89373e-06	4.93043e-05	2.77195e-05	0.0180326	0.985613	1
CNspg	560	89900	1100.16	81.7482	1596.82	190.204	25.1977	4.25e-140	1.76e-139		1.45145		0.000104732	7.33176e-06	0.0001091	1.06295e-05	-0.00264451	0.99789	1
DCO	96	90000	12641.2	986.341	11248.2	5902.79	-1.86876	0.0616564	0.0870743		0.889802		0.00120333	8.89254e-05	0.000778315	0.000419355	0.0812514	0.935242	1
VCO	101	90100	18962.5	1576.74	22973.1	4078.38	9.20789	3.33e-20	5.29e-20		1.21151		0.00180597	0.000153248	0.00157662	0.000295316	0.0344693	0.972503	1
DCN	720	90200	3110.33	603.758	1	0	-62.8081	0	0		0.000321509		0.000296408	5.80062e-05	0	0	0.00029104	0.999768	1
CU	711	90300	2999.06	546.372	1	0	-62.5234	0	0		0.000333438		0.000285786	5.25106e-05	0	0	0.000290486	0.999768	1
GR	1039	90400	111.537	79.0661	1	0	-36.7274	2.67e-295	2.48e-294		0.00896563		1.06223e-05	7.54868e-06	0	0	0.000240525	0.999808	1
ECU	903	90500	4728.62	520.046	72.4754	236.09	-18.6932	5.62e-78	1.43e-77		0.015327		0.000450366	4.99845e-05	5.25901e-06	1.73872e-05	0.079444	0.936679	1
NTB	642	90600	5124.79	837.206	14731.1	3121.54	35.0606	2.69e-269	2.34e-268		2.87448		0.000485722	6.37199e-05	0.00100151	0.000179555	-0.121568	0.903241	1
NTS	651	90700	13247.6	1967.96	754.803	1244.23	-13.2102	7.66e-40	1.41e-39		0.0569766		0.00125975	0.000174692	5.354e-05	8.94115e-05	0.17836	0.85844	1
NTSce	659	90800	244.139	44.5342	1	0	-42.8891	0	0		0.00409603		2.32525e-05	4.21859e-06	0	0	0.000252415	0.999799	1
NTSco	666	90900	1087.66	429.238	1	0	-54.5934	0	0		0.000919407		0.000103348	4.04234e-05	0	0	0.000275051	0.999781	1
NTSge	674	91000	665.315	153.045	1	0	-50.7471	0	0		0.00150305		6.30216e-05	1.34928e-05	0	0	0.000267545	0.999787	1
NTSl	682	91100	4663.75	554.282	100.344	327.42	-16.5103	3.09e-61	6.81e-61		0.0215158		0.000444046	5.16902e-05	7.23548e-06	2.36758e-05	0.086096	0.93139	1
NTSm	691	91200	6586.81	957.174	655.279	980.312	-10.8229	2.68e-27	4.48e-27		0.0994835		0.000626077	8.29363e-05	4.63045e-05	7.00339e-05	0.135603	0.892135	1
SPVC	429	91300	5036.58	2877.1	3.93443	1.76889	-110.816	0	0		0.00078117		0.000481713	0.00027595	2.64222e-07	1.27279e-07	0.0301388	0.975956	1
SPVI	437	91400	30670.3	3500.91	1014.7	2778.05	-12.8169	1.32e-37	2.39e-37		0.0330843		0.00291874	0.000311667	7.28131e-05	0.00019917	0.244274	0.807019	1
SPVO	445	91500	11143.6	1255.69	8992.16	7175.71	-131.659	0	0		0.806934		0.00105878	9.02422e-05	0.000625809	0.000505646	0.0889567	0.929116	1
SPVOcdm	77	91600	752.417	77.3574	236.656	466.836	-4.95454	7.25e-07	1.07e-06		0.314528		7.1534e-05	5.85651e-06	1.6806e-05	3.33513e-05	0.0435753	0.965243	1
SPVOmdmd	53	91700	1057.93	119.826	713.115	803.296	-70.0016	0	0		0.674069		0.000100551	9.07271e-06	4.98358e-05	5.66448e-05	0.0342088	0.972711	1
SPVOmdmv	61	91800	1355.83	147.137	830.508	965.827	-95.0794	0	0		0.612544		0.000128832	1.05598e-05	5.80959e-05	6.81806e-05	0.0423258	0.966239	1
SPVOrdm	45	91900	1643.99	177.684	1870.38	1092.77	33.999	2.3e-253	1.87e-252		1.13771		0.000156229	1.27479e-05	0.000129405	7.63188e-05	0.0138144	0.988978	1
SPVOvl	69	92000	6333.44	767.805	5343.3	4297.54	-79.8638	0	0		0.843663		0.000601636	5.62315e-05	0.000371666	0.000301698	0.0624433	0.95021	1
MY-mot	370	92200	350969	43497.4	227479	132180	-5.86471	4.5e-09	6.71e-09		0.648147		0.033329	0.00332742	0.0157397	0.00930918	0.653165	0.51365	1
VI	653	92300	604.38	148.375	1209.67	414.303	9.7707	1.5e-22	2.41e-22		2.00151		5.71139e-05	1.26125e-05	8.29388e-05	2.79509e-05	-0.0196679	0.984308	1
VII	661	92500	11984.7	1297.25	15258.2	7769.76	2.87383	0.00405524	0.00580913		1.27314		0.0011391	9.62228e-05	0.00105338	0.000545887	0.0160724	0.987177	1
ACVII	576	92600	276.315	27.3095	435.459	123.977	11.2592	2.09e-29	3.54e-29		1.57595		2.6275e-05	2.12354e-06	2.99209e-05	8.74866e-06	-0.00433056	0.996545	1
AMB	135	92800	5289.81	2223.3	184.426	537.977	-13.696	1.07e-42	2e-42		0.0348644		0.000505041	0.000214208	1.30763e-05	3.79962e-05	0.102448	0.918401	1
AMBd	939	92900	689.787	93.1714	35.9672	129.875	-14.0999	3.8e-45	7.32e-45		0.0521425		6.56089e-05	7.96052e-06	2.49321e-06	9.12073e-06	0.0399024	0.968171	1
AMBv	143	93000	1509.12	171.819	149.328	413.201	-9.85951	6.24e-23	1e-22		0.0989503		0.00014352	1.39399e-05	1.05831e-05	2.92617e-05	0.0649064	0.948249	1
DMX	839	93100	2033.87	760.8	1	0	-59.4878	0	0		0.000491673		0.000193151	7.14149e-05	0	0	0.000284541	0.999773	1
GRN	1048	93300	84142.1	14748	59754	41009.9	-3.05645	0.00223977	0.00322387		0.710155		0.00797269	0.0011707	0.00414226	0.00287589	0.289403	0.772273	1
ICB	372	93400	173.759	14.4635	179.951	177.457	2.91363	0.00357252	0.00512374		1.03563		1.65313e-05	1.17619e-06	1.25478e-05	1.2414e-05	0.00638157	0.994908	1
IO	83	93500	17846.1	4310.61	315.246	1268.64	-15.1808	4.74e-52	9.64e-52		0.0176647		0.00169324	0.000384406	2.18563e-05	8.81394e-05	0.158254	0.874256	1
IRN	136	93600	47188.6	4120.08	24384.3	16094.8	-6.70667	1.99e-11	3.03e-11		0.516741		0.00448828	0.00031376	0.0016867	0.00112453	0.285124	0.775549	1
ISN	106	93700	988.583	109.411	1341.61	585.205	65.719	0	0		1.3571		9.39618e-05	8.17897e-06	9.24365e-05	4.0839e-05	0.000985279	0.999214	1
LIN	203	93800	787.278	93.156	6.86885	28.601	-30.0735	1.07e-198	6.93e-198		0.00872481		7.48803e-05	7.76346e-06	4.13855e-07	2.02078e-06	0.0260771	0.979196	1
LRN	235	93900	8841.14	2498.81	1	0	-70.9708	0	0		0.000113108		0.000842498	0.000236896	0	0	0.000306893	0.999755	1
LRNm	955	94000	8184.95	2351.67	1	0	-63.3798	0	0		0.000122175		0.000780024	0.000223231	0	0	0.000305723	0.999756	1
LRNp	963	94100	656.185	166.045	1	0	-50.6389	0	0		0.00152396		6.24747e-05	1.54068e-05	0	0	0.000267413	0.999787	1
MARN	307	94200	24177.4	4751	23083.6	13548.9	-44.2709	0	0		0.954759		0.00228879	0.000381853	0.00159446	0.000947094	0.0955025	0.923916	1
MDRN	395	94300	12608.7	8002.02	1	0	-73.7438	0	0		7.93105e-05		0.00120456	0.000766414	0	0	0.000312318	0.999751	1
MDRNd	1098	94400	3111.29	1827.86	1	0	-62.8105	0	0		0.00032141		0.000297702	0.000175078	0	0	0.000291106	0.999768	1
MDRNv	1107	94500	9497.48	6306.31	1	0	-71.5302	0	0		0.000105291		0.000906854	0.000603811	0	0	0.00030801	0.999754	1
PARN	852	94600	31933.6	2858.47	20793.6	9950.07	-6.67518	2.47e-11	3.76e-11		0.65115		0.0030369	0.000210273	0.00143819	0.000712408	0.196646	0.844105	1
PAS	859	94700	400.759	141.113	1	0	-46.7767	0	0		0.00249526		3.82272e-05	1.34218e-05	0	0	0.000259959	0.999793	1
PGRN	938	94800	21879	2419.71	9610.34	10909.7	-563.709	0	0		0.43925		0.00207702	0.000157199	0.000672577	0.000770217	0.209994	0.833672	1
PGRNd	970	94900	7419.91	1535.59	5612.25	5518.17	-136.733	0	0		0.756377		0.000702432	0.000130066	0.00039296	0.000391419	0.078392	0.937516	1
PGRNl	978	95000	14459.1	1443.39	3998.36	5693.14	-6.77174	1.27e-11	1.94e-11		0.27653		0.00137459	0.000106704	0.000279617	0.000399905	0.196973	0.843849	1
PHY	154	95100	11559.6	2319.33	9117.44	7523.92	-147.191	0	0		0.788736		0.00109496	0.00019905	0.000636454	0.000532311	0.0927572	0.926096	1
NR	177	95300	563.315	120.284	6.60656	30.9205	-27.0908	1.26e-161	6.31e-161		0.011728		5.33915e-05	1.06946e-05	3.93254e-07	2.16413e-06	0.024003	0.98085	1
PRP	169	95400	10996.2	2203.72	9111.8	7511.44	-115.655	0	0		0.828628		0.00104157	0.000188832	0.000636061	0.000531454	0.0837681	0.933241	1
PPY	1069	95600	2291.43	373.315	1498.84	1734.91	-2.51985	0.0117406	0.0166987		0.654106		0.000217128	2.78694e-05	0.000104418	0.000121726	0.0518122	0.958678	1
VNC	701	95900	56252.9	4418.72	59168	25316.9	0.979178	0.327492	0.453946		1.05182		0.00534621	0.000235222	0.00407836	0.00178053	0.112871	0.910132	1
LAV	209	96000	10754.1	991.221	11794.2	5534.74	1.24539	0.212988	0.297985		1.09671		0.00102255	7.21497e-05	0.000813854	0.000386715	0.0422459	0.966303	1
MV	202	96100	26128	2396.96	29930.5	16425.2	2.04056	0.0412944	0.0583868		1.14554		0.00248138	0.000133878	0.00206481	0.00114127	0.053795	0.957099	1
SPIV	225	96200	9527.56	740.937	3404.23	4094	-427.738	0	0		0.357303		0.000906206	5.33423e-05	0.000239832	0.000292062	0.149968	0.88079	1
SUV	217	96300	9843.19	851.372	14039.4	3047.72	13.4241	4.37e-41	8.1e-41		1.42631		0.000936074	6.18928e-05	0.000959872	0.000198169	-0.00483406	0.996143	1
x	765	96400	1095.82	96.2642	663.574	705.516	-87.1086	0	0		0.605548		0.00010422	7.27152e-06	4.64499e-05	4.98831e-05	0.0384486	0.96933	1
XII	773	96500	8176.19	2834.14	9.60656	47.1887	-36.3298	5.49e-289	5.06e-288		0.00117494		0.000776663	0.000267764	6.04364e-07	3.31737e-06	0.0434556	0.965338	1
y	781	96600	437.185	29.9527	470.148	352.76	9.70894	2.76e-22	4.42e-22		1.0754		4.16111e-05	2.54504e-06	3.26084e-05	2.45286e-05	0.0090528	0.992777	1
MY-sat	379	96800	13876.2	3706.27	17520	4878.07	184.14	0	0		1.26259		0.00131583	0.000341166	0.00120263	0.000343618	0.0197875	0.984213	1
RM	206	96900	7669.18	2010.02	15443.1	3914.92	464.639	0	0		2.01366		0.000726431	0.000180747	0.00105926	0.000274125	-0.0709986	0.943399	1
RPA	230	97000	3064.24	961.814	1985.84	962.215	-129.157	0	0		0.648068		0.000290812	9.06e-05	0.000136945	6.77899e-05	0.0611755	0.951219	1
RO	222	97100	3142.86	1025.75	91.9344	308.709	-14.2357	5.5e-46	1.07e-45		0.0292518		0.00029859	9.71293e-05	6.42887e-06	2.15555e-05	0.0755516	0.939776	1
fiber tracts	1009	97200	635.139	162.932	1062.44	250.989	11.045	2.32e-28	3.9e-28		1.67277		6.02813e-05	1.49519e-05	7.25447e-05	1.62083e-05	-0.00950487	0.992416	1
cm	967	97300	619.352	160.564	1020.75	247.752	10.5364	5.87e-26	9.75e-26		1.6481		5.87876e-05	1.47578e-05	6.97117e-05	1.61068e-05	-0.00860109	0.993137	1
drt	792	102000	617.352	160.642	1019.08	247.804	10.5269	6.49e-26	1.07e-25		1.65073		5.8597e-05	1.47679e-05	6.95971e-05	1.61107e-05	-0.00867201	0.993081	1
cett	932	102100	617.352	160.642	1019.08	247.804	10.5269	6.49e-26	1.07e-25		1.65073		5.8597e-05	1.47679e-05	6.95971e-05	1.61107e-05	-0.00867201	0.993081	1
fpr	586	102500	10.3704	3.06805	22.1803	4.5222	18.8184	5.33e-79	1.37e-78		2.13882		9.80024e-07	2.95933e-07	1.51395e-06	2.83182e-07	-0.00305417	0.997563	1
dc	514	102600	607.019	160.063	996.902	246.991	10.2252	1.53e-24	2.5e-24		1.64229		5.7617e-05	1.47323e-05	6.80831e-05	1.60917e-05	-0.00833012	0.993354	1
sst	871	103100	2.01852	0.579743	1.77049	0.528944	-1.11418	0.265204	0.368458		0.877124		1.90632e-07	5.97742e-08	1.14645e-07	4.96583e-08	0.00116182	0.999073	1
stp	277	103800	2.01852	0.579743	1.77049	0.528944	-1.11418	0.265204	0.368458		0.877124		1.90632e-07	5.97742e-08	1.14645e-07	4.96583e-08	0.00116182	0.999073	1
lfbs	983	106000	9.87037	2.68987	19.918	5.2003	16.384	2.49e-60	5.39e-60		2.01796		9.31709e-07	2.51311e-07	1.35263e-06	3.05293e-07	-0.00251004	0.997997	1
cst	784	106900	9.87037	2.68987	19.918	5.2003	16.384	2.49e-60	5.39e-60		2.01796		9.31709e-07	2.51311e-07	1.35263e-06	3.05293e-07	-0.00251004	0.997997	1
cstu	1028	107900	9.87037	2.68987	19.918	5.2003	16.384	2.49e-60	5.39e-60		2.01796		9.31709e-07	2.51311e-07	1.35263e-06	3.05293e-07	-0.00251004	0.997997	1
mfbs	991	110500	5.98148	2.29986	21.7705	5.24529	25.9608	1.37e-148	6e-148		3.63965		5.61962e-07	2.17395e-07	1.48037e-06	3.1145e-07	-0.00583558	0.995344	1
mfbc	768	110600	1.89815	1.06727	1.93443	0.963827	0.163835	0.869861	1		1.01911		1.3804e-07	1.37042e-07	1.10336e-07	8.62272e-08	0.000482386	0.999615	1
mfsbshy	824	112700	4.50926	1.49451	20.1311	4.84588	27.937	9.49e-172	5.03e-171		4.4644		4.23922e-07	1.4756e-07	1.37003e-06	2.92542e-07	-0.00637978	0.99491	1
poc	174	113000	1	0	10.7869	3.31217	22.9077	3.89e-116	1.33e-115		10.7869		0	0	7.34406e-07	2.19322e-07	-0.000173643	0.999861	1
php	182	113700	4.50926	1.49451	9.36066	3.27634	11.8407	2.4e-32	4.19e-32		2.07587		4.23922e-07	1.4756e-07	6.35627e-07	2.07086e-07	-0.00185596	0.998519	1
